1 **Title page**

2 **Title:** BNIP3 phosphorylation by JNK1/2 promotes mitophagy via enhancing its stability under hypoxia

3 **Running title:** JNK1/2 regulates BNIP3-mediated mitophagy

4 **Authors:** Yun-Ling He<sup>1</sup>, Sheng-Hui Gong<sup>1</sup>, Xiang Cheng<sup>1</sup>, Ming Zhao<sup>1</sup>, Tong Zhao<sup>1</sup>, Yong-Qi Zhao<sup>1</sup>, Ming  
5 Fan<sup>1,2,3\*</sup>, Ling-Ling Zhu<sup>1,2\*\*</sup>, Li-Ying Wu<sup>1,4\*\*\*</sup>

6 **Affiliation:**

7 <sup>1</sup>Department of Cognitive Sciences, Institute of Cognition and Brain Sciences, Beijing, 100850, China

8 <sup>2</sup>Co-Innovation Center of Neuroregeneration, Nantong University, Nantong, 226001, China

9 <sup>3</sup>Beijing Institute for Brain Disorder, Beijing, 102206, China

10 <sup>4</sup>State Key Laboratory of Proteomics, Beijing Proteome Research Center, Beijing Institute of Radiation  
11 Medicine, Beijing, 100850, China

12 **Correspondence:**

13 \* Corresponding author. Tel: +86 10 66932333; Email: fanmingchina@126.com

14 \*\* Corresponding author. Tel: +86 10 66931315; Email: linglingzhu@hotmail.com

15 \*\*\* Corresponding author. Tel: +86 10 66930297; Email: liyingwu\_china@163.com

16 **Keywords:**

17 BNIP3; hypoxia; mitophagy; phosphorylation; ubiquitination

18

## 19 **Abstract**

20 Mitophagy is an important metabolic mechanism that modulates mitochondrial quality and quantity by  
21 selectively removing damaged or unwanted mitochondria. BNIP3, a mitochondrial outer membrane protein, is a  
22 mitophagy receptor that mediates mitophagy under various stresses, particularly hypoxia, since BNIP3 is a  
23 hypoxia-responsive protein. However, the underlying mechanisms that regulate BNIP3 and thus mediate  
24 mitophagy under hypoxic conditions remain elusive. Here, we demonstrate that in hypoxia JNK1/2  
25 phosphorylates BNIP3 at Ser 60/Thr 66, which hampers proteasomal degradation of BNIP3 and drives  
26 mitophagy by facilitating the direct binding of BNIP3 to LC3, while PP1/2A represses mitophagy by  
27 dephosphorylating BNIP3 and triggering its proteasomal degradation. These findings reveal the intrinsic  
28 mechanisms cells use to regulate mitophagy via the JNK1/2 -BNIP3 pathway in response to hypoxia. Thus, the  
29 JNK1/2-BNIP3 signaling pathway strongly links mitophagy to hypoxia and may be a promising therapeutic  
30 target for hypoxia-related diseases.

## 31 **Introduction**

32 Under normal circumstances, functional mitochondria are energy factories that provide the cellular ATP  
33 required for cellular activities. However, under hypoxic conditions, mitochondria become sites where excessive  
34 reactive oxygen species (ROS) are generated, which in turn impairs mitochondria function (Scherz-Shouval &  
35 Elazar, 2011). The damaged mitochondria release proteins that participate in the initiation of apoptosis (Ashrafi  
36 & Schwarz, 2013; Kubli & Gustafsson, 2012; Marino *et al*, 2014). To defend against the harmful effects of  
37 dysfunctional mitochondria and maintain homeostasis, cells initiate protective mechanisms to compensate for  
38 damaged mitochondria prior to suffering harm. Mitophagy is recognized as a major protective mechanism by  
39 which dysfunctional mitochondria are cleared to enhance overall mitochondria quality and simultaneously  
40 provide rapid recycling of metabolites (Palikaras *et al*, 2018). The mitophagy process is complicated and  
41 involves mitochondrial dynamics, recognition and labeling of target mitochondria, envelopment of mitochondria  
42 by autophagosomes, fusion of autophagosomes-lysosomes and degradation of mitochondria by proteases in  
43 lysosomes (Ashrafi & Schwarz, 2013; Palikaras *et al.*, 2018; Youle & Narendra, 2011). Among these processes,  
44 recognizing and labeling damaged or unwanted mitochondria is a critical process, considering that mitophagy is  
45 one of selective autophagy.

46 Two critical recognition signals are required for mitophagy in mammalian cells: ubiquitin (Ub)-adaptor- and  
47 receptor-mediated mitochondrial conjunction with LC3 (microtubule-associated protein 1 light chain 3) on the  
48 autophagosomes (Dikic & Elazar, 2018). Ubiquitin-adaptor-mediated mitophagy is provoked by the classic  
49 PINK1 (PTEN-induced kinase 1) and E3 ubiquitin protein ligase Parkin pathway (Pickrell & Youle, 2015), and  
50 receptor-mediated mitophagy is initiated by several mitochondrial outer membrane proteins: the BH3-only  
51 proteins BNIP3 (BCL2/adenovirus e1B 19 kDa protein interacting protein 3) and BNIP3L (BNIP3-like, also  
52 known as NIX), which are 56% identical (Hamacher-Brady & Brady, 2016; Kubli & Gustafsson, 2012),  
53 FUNDC1 (FUN14 domain-containing protein 1), etc. (Kirkin & Rogov, 2019; Liu *et al*, 2014) In the former  
54 signaling pathway, when the mitochondrial membrane potential is lost under stress conditions, PINK1, a  
55 mitochondrial kinase, accumulates on the outer membrane of mitochondria (Narendra *et al*, 2010) and activates  
56 the E3 ubiquitin ligase activity of Parkin via phosphorylation of Parkin and ubiquitin (Kane *et al*, 2014; Koyano  
57 *et al*, 2014), which recruits Parkin to the damaged mitochondria (Geisler *et al*, 2010; Narendra *et al.*, 2010).

58 Parkin selectively ubiquitinates its substrates on the outer membrane of mitochondria, and the ubiquitin-  
59 conjugated substrates are recognized by ubiquitin-binding adaptor proteins (for example p62, NDP52, and  
60 OPTN) that link with LC3 on the developing autophagosomes, leading to mitochondrial sequestration by the  
61 autophagosomes and removal by the lysosomes (Geisler *et al.*, 2010; Heo *et al.*, 2015; Lazarou *et al.*, 2015). In  
62 the latter signaling pathway, previous studies have shown that mitophagy receptors possess the characteristic  
63 recognition sequence W/F/YxxL/I/V for LC3 that mediates selective autophagy (Rogov *et al.*, 2014).  
64 Coincidentally, many mitophagy receptors are responsive to hypoxia. A series of reports on FUNDC1 indicate  
65 that under normoxic conditions, FUNDC1 is phosphorylated at Tyr 18 and Ser 13 by Src and CK2 (casein  
66 kinase 2), which hampers the interaction of LC3 with FUNDC1; under hypoxic conditions or loss of  
67 mitochondrial membrane potential, Src and CK2 are unable and ULK1 (Unc-51-like kinase 1) is able to  
68 phosphorylate FUNDC1 at Ser 17, and PGAM5 (phosphoglycerate mutase family member 5) dephosphorylates  
69 FUNDC1 at Ser 13, all of which lead to enhanced interaction of FUNDC1 and LC3, and hence, mitophagy  
70 induction (Chen *et al.*, 2014; Liu *et al.*, 2012; Wu *et al.*, 2014). To date, the regulation mechanisms of FUNDC1-  
71 and PINK1/Parkin-mediated mitophagy have been well illustrated. However, until now, the mechanisms  
72 underlying BNIP3/BNIP3L-mediated mitophagy, especially under hypoxic conditions, have been far from clear.  
73 Although it has been demonstrated that the phosphorylation of BNIP3 at Ser 17/24 and BNIP3L at Ser 34/35 or  
74 Ser 81 enhances their respective association with LC3 and facilitates activation of mitophagy (Rogov *et al.*, 2017;  
75 Yuan *et al.*, 2017; Zhu *et al.*, 2013), but the kinases and phosphatases targeting BNIP3/BNIP3L have not yet been  
76 uncovered.

77 BNIP3 is a member of the atypical BH3-only subfamily within the BCL-2 family and is localized at the  
78 mitochondrial outer membrane (Chen *et al.*, 1997; Yasuda *et al.*, 1998). BNIP3 is transcriptionally activated by  
79 the transcription factor HIF-1 (hypoxia-inducible factor 1) under hypoxia, which is why it is extremely sensitive  
80 to hypoxia and is generally used as a typical target gene of HIF-1 (Bruick, 2000; Guo *et al.*, 2001; Sowter *et al.*,  
81 2001). In addition, as far as we know, BNIP3 is more sensitive to hypoxia than any of the other proteins on the  
82 mitochondrial outer membrane (Bruick, 2000). The functions of BNIP3 appear to be contradictory, involving  
83 the induction of apoptosis or mitophagy in different contexts or cell types (Bellot *et al.*, 2009; Chourasia *et al.*,  
84 2015; Diwan *et al.*, 2007; Ney, 2015; Zhang *et al.*, 2008); however, the precise mechanisms of BNIP3 functions  
85 have not been elucidated. In recent years, many studies have focused on BNIP3-mediated mitophagy, but how  
86 BNIP3 regulates mitophagy under hypoxia remains unclear. It has been demonstrated that overexpression of  
87 BNIP3 under hypoxic conditions promotes its interaction with BCL-2/BCL-XL, which contributes to the release  
88 of Beclin-1 from BCL-2/BCL-XL binding and initiates autophagy (Bellot *et al.*, 2009; Zhang *et al.*, 2008).  
89 However, after induction of autophagy by overexpression of BNIP3, how damaged mitochondria are recognized  
90 to initiate mitophagy in the same context has not been clarified. Some studies have reported that BNIP3  
91 overexpression promotes mitophagy by enhancing its interaction with the autophagosome membrane protein  
92 LC3 (Hanna *et al.*, 2012; Ma *et al.*, 2012). Here, we demonstrate that BNIP3 phosphorylation, rather than its  
93 overexpression, plays a decisive role in mediating mitophagy.

94 In this study, we identified the new phosphorylation site Ser 60/Thr 66 in BNIP3. Most importantly, we  
95 identified JNK1/2 (c-Jun N-terminal kinase 1/2) and PP1/2A (protein phosphatase 1/2A) as the kinase and  
96 phosphatase responsible for phosphorylation and dephosphorylation, respectively, of BNIP3 at Ser 60/Thr 66  
97 residue in response to hypoxia. Furthermore, we demonstrated that phosphorylation of BNIP3 by JNK1/2 is

98 required for both induction of mitophagy and increased stability of BNIP3, while dephosphorylation of BNIP3  
99 by PP1/2A causes proteasomal degradation of BNIP3 and accordingly failure of mitophagy induction. To the  
100 best of our knowledge, the mechanisms by which BNIP3 is degraded via the ubiquitin-proteasome pathway  
101 have not previously been revealed. Here, we report the crosstalk between BNIP3-mediated mitophagy and its  
102 proteasomal degradation under hypoxic conditions. Collectively, our study shows that JNK1/2 and PP1/2A  
103 oppositely regulate BNIP3 phosphorylation and consequently manipulate its stability, which in turn affects the  
104 induction of mitophagy.

## 105 **Results**

### 106 **Phosphorylation of BNIP3 is related to mitophagy under hypoxia**

107 We first observed mitophagy under different hypoxia conditions using an oxygen-sensitive PC12 cell line  
108 (Millhorn *et al.*, 1996), and surprisingly found that mitophagy under different hypoxia conditions is vastly  
109 different. Compared with normoxia (20% O<sub>2</sub>), 10% O<sub>2</sub> promoted mitophagy and 0.3% O<sub>2</sub> suppressed mitophagy  
110 when cells were exposed to the different oxygen levels for the same time, based on analysis of the  
111 morphological characteristics of mitochondria via transmission electron microscopy (TEM) and TOMM20  
112 expression, and the co-localization of autophagosomes and mitochondria via a fluorescence confocal  
113 microscopy (Fig. 1A, B and Fig. EV1A). To investigate the possible causes of different mitophagy under  
114 different hypoxia conditions, we then evaluated the effects of BNIP3 on mitophagy under different hypoxia,  
115 because BNIP3 is extremely sensitive to hypoxia stimulation except as a mitophagy receptor. Notably, we found  
116 that the BNIP3 protein bands in the 10% O<sub>2</sub> group lay at the top (30 kDa), while most of the bands in the 0.3%  
117 O<sub>2</sub> group accumulated beneath the top 24 h after exposure to hypoxia. Comparatively, the protein level at the  
118 top was higher in the 10% O<sub>2</sub> group than in the 0.3% O<sub>2</sub> group but not the total protein level. Meanwhile, we  
119 noticed that the BNIP3 protein level at the top was consistent with the mitophagy activity (Fig. 1C). In addition,  
120 when *Bnip3* was knocked down with siRNA, mitophagy in the 10% O<sub>2</sub> group was obviously attenuated, with  
121 reduced levels of the autophagosome marker LC3-II and increased levels of the mitochondrial outer membrane  
122 protein TOMM20, while knockdown of *Bnip3* in the 0.3% O<sub>2</sub> group did not lead to comparable differences in  
123 mitophagy (Fig. 1D). It such seems that the high BNIP3 protein level in the 0.3% O<sub>2</sub> group was not conducive to  
124 mitophagy activity. Taken together, these data indicate that regulation of mitophagy by BNIP3 is not completely  
125 dependent on its protein level.

126 Considering post-translational modifications, we speculated that phosphorylation and dephosphorylation  
127 might be involved in regulating the differences in BNIP3 protein bands. To determine if the top BNIP3 band  
128 was a result of phosphorylation modification, we added lambda phosphatase ( $\lambda$ -PPase) to cell lysates and  
129 excitedly found that all the upper bands migrated downwards at 24 h after exposure to different oxygen  
130 concentrations or exposure for different time intervals (Fig. 1E). Conversely, after cells were exposed to the  
131 phosphatase inhibitor okadaic acid (OA), nearly all the BNIP3 protein bands in the normoxia (20% O<sub>2</sub>) group  
132 quickly accumulated at the top, and the bands in the hypoxia (0.3% O<sub>2</sub>) group gradually migrated upwards and  
133 eventually reached the top as the concentration of OA was increased (Fig. 1F). From the above results, we  
134 inferred that BNIP3 is regulated by multisite phosphorylation, and the fully phosphorylated form (hereafter  
135 referred to as phosphorylation of BNIP3) is located at the top of protein bands, consistent with the description in

136 previous reports that BNIP3 exists in multiple phosphorylated forms (Graham *et al.*, 2007; Mellor *et al.*, 2010).  
137 To clarify whether the BNIP3 phosphorylation contributes to mitophagy induction, we examined the correlation  
138 between BNIP3 phosphorylation and mitophagy by comparing the dynamic changes in related proteins under  
139 0.3% O<sub>2</sub> hypoxic conditions in PC12 cells. The results clearly showed that when the levels of BNIP3  
140 phosphorylation increased with time during early hypoxia, mitophagy was augmented, with increased LC3-II  
141 and lower TOMM20 levels; by contrast, when BNIP3 phosphorylation decreased during late hypoxia,  
142 mitophagy was suppressed, with less LC3-II and undiminished TOMM20 expression, which was verified in the  
143 HeLa cells that is used widely for genetic engineering (Fig. 1G and Fig. EV1B). Collectively, these preliminary  
144 results demonstrate that BNIP3 phosphorylation is closely associated with mitophagy activation.

#### 145 **Phosphorylation of BNIP3 at S60/T66 is necessary to promote mitophagy via enhancing its interaction** 146 **with LC3**

147 To find potential phosphorylation sites in BNIP3, we first searched the “PhosphoSite” database  
148 (<http://www.phosphosite.org>). Based on reported proteomics data, a total of 12 BNIP3 phosphorylation events  
149 based on mass spectra evidence are shown in the schematic in Fig. 2A, which represent highly conserved serine  
150 or threonine (S/T) residues across vertebrates. To further determine the specific phosphorylation sites that affect  
151 the migration of BNIP3 protein bands, mutants were constructed in which each of the 12 S/T residues was  
152 changed to alanine (A) via site-directed mutagenesis to inactivate phosphorylation. HeLa cells were transfected  
153 with Flag-tagged BNIP3-S/T to A mutants, and the protein phosphorylation was assessed on the basis of  
154 changes in the migration of the protein bands after treatment with OA. The results revealed that S/T-to-A  
155 replacement at Ser 60 (S60A) blocked the upshift of BNIP3 protein bands (Fig. 2B) and double replacement at  
156 Ser 60 and Thr 66 (S60/T66A) potentiated this effect (Fig. 2C), given that these two sites have the common  
157 motif recognized by MAPKs (mitogen-activated protein kinases) or CDKs (cyclin-dependent kinases). These  
158 data indicate that Ser 60 and Thr 66 are the potential phosphorylation sites of BNIP3 and the former is the  
159 primary one, the latter is synergistic. To validate the two phosphorylation sites of BNIP3, we first  
160 immunoprecipitated Flag-BNIP3 and tested the precipitates with an antibody against phospho-MAPK/CDK  
161 substrates. As expected, both the S60A and S60/T66A mutants reduced the levels of potential phosphorylation  
162 of BNIP3 compared to wild-type (WT) (Fig. EV2A). Then, we produced a specific antibody directed to  
163 phospho-Ser 60 (p-S60) of BNIP3. This antibody recognized WT, but not the S60A and S60/T66A mutants (Fig.  
164 2D). Using the p-S60 antibody we observed that BNIP3 phosphorylation was increased in the early stage of  
165 hypoxia and reduced in the late stage of hypoxia (Fig. 2E). Altogether, these data suggest that Ser 60 is the  
166 primary phosphorylation site of BNIP3. Thereafter, we also examined the effects of hypoxia on phosphorylation  
167 of BNIP3 at Ser 60 and the effects of disabling phosphorylation at Ser 60/Thr 66 on mitophagy in one  
168 experiment. It is clear that hypoxia increased the phosphorylation of BNIP3 at Ser 60 and promoted mitophagy  
169 with reduced TOMM20 and increased LC3-II. Introduction of siRNA-resistant phosphorylation-disabled  
170 S60/T66A mutant after *Bnip3* knockdown with siRNA impaired the effect of hypoxia on mitophagy (Fig. 2F).  
171 These results indicate that the phosphorylation of BNIP3 at Ser 60/Thr 66 is required for promoting mitophagy.

172 According to previous studies that overexpression of BNIP3 in hypoxia competes with Beclin-1 to interact  
173 with BCL-2, followed by release of Beclin-1 and induction of mitophagy (Bellot *et al.*, 2009; Zhang *et al.*,  
174 2008), we next investigated whether the phosphorylation of BNIP3 at Ser 60/Thr 66 site could affect its

175 association with BCL-2 and thus affect the induction of mitophagy. Regrettably, all mutations of BNIP3  
176 displayed no significant differences in interaction with BCL-2 compared to the WT BNIP3 (Fig. EV2B),  
177 suggesting that the phosphorylation of BNIP3 at least at Ser 60/Thr 66 site is not related with the interaction  
178 between BNIP3 and BCL-2. After that, we examined whether the phosphorylation of BNIP3 Ser 60/Thr 66  
179 would affect its binding to LC3. Cells expressing GFP-tagged LC3 and Flag-tagged WT or mutant BNIP3 were  
180 collected for co-IP assays. In line with previous studies (Hanna *et al.*, 2012; Ma *et al.*, 2012), GFP-LC3-II was  
181 co-precipitated with BNIP3 WT, whereas the interaction was abated by S60A or S60/T66A mutant and  
182 mitophagy was inhibited. By contrast, a BNIP3-S60 to aspartic acid (S60D) or to glutamic acid (S60E) mutation  
183 that mimics phosphorylation enhanced the binding affinity between BNIP3 and GFP-LC3-II and increased  
184 mitophagy (Fig. 2G). To demonstrate further whether the phosphorylation of BNIP3 at Ser 60/Thr 66 impacts  
185 mitophagy, we expressed these BNIP3 mutants in cells and detected mitophagy via fluorescence confocal  
186 microscopy. We observed that the S60A and S60/T66A mutants led to inhibition of mitophagy, while the S60D  
187 and S60E mutants induced more pronounced mitophagy, as shown by the appearance of more LC3 puncta and  
188 fewer mitochondria (Fig. 2H). Taken together, these results indicate that phosphorylation of BNIP3 at Ser  
189 60/Thr 66 is necessary for its interaction with LC3 and induction of mitophagy.

#### 190 **Phosphorylation of BNIP3 at S60/T66 is essential to improve its stability**

191 In addition to the correlation with mitophagy, BNIP3 phosphorylation is also related to its stability. We  
192 unexpectedly found that the phosphatase inhibitor OA hindered rapid degradation of BNIP3 when protein  
193 synthesis was inhibited with cycloheximide (CHX) under 0.3% O<sub>2</sub> conditions. The proteasome inhibitor MG132  
194 led to more protein accumulated, but as the concentration of OA increased, the accumulation of BNIP3 by  
195 MG132 was reduced (Fig. 3A, B), indicating that BNIP3 phosphorylation may impede its proteasomal  
196 degradation. To determine whether phosphorylation at the Ser 60/Thr 66 site is involved in regulation of BNIP3  
197 stability, we measured the effect of the phospho-disabling or phospho-mimic mutations of these sites on BNIP3  
198 degradation after HeLa cells were transfected with the mutants and treated with CHX. Our data demonstrated  
199 that the S60A and S60/T66A mutants accelerated the degradation of BNIP3, and the S60D and S60E mutants  
200 dramatically hampered this process, suggesting that phosphorylation at Ser 60/Thr 66 is required for BNIP3  
201 stability (Fig. 3C-F). Since ubiquitination usually leads to proteasomal degradation, we further detected the  
202 relationship between phosphorylation and ubiquitination of BNIP3. As shown in Fig. 3G, the phospho-disabling  
203 and phospho-mimic BNIP3 mutants were linked with more or fewer ubiquitin molecules than the wild-type  
204 protein, respectively, which confirmed our above findings. Collectively, these results indicate that  
205 phosphorylation of BNIP3 at Ser 60/Thr 66 promotes its stability. Thus, we propose that the improved BNIP3  
206 stability may be the premise and foundation for the induction of mitophagy.

#### 207 **JNK1/2 is the kinase responsible for phosphorylation of BNIP3 at S60/T66**

208 Subsequently, we sought to identify which kinases are responsible for the phosphorylation of BNIP3 Ser 60/Thr  
209 66 to better understand the mechanism by which BNIP3 is phosphorylated and thereby mediates mitophagy  
210 activation. Since the Ser 60/Thr 66 residue within the consensus motif of MAPKs and CDKs, we screened  
211 BNIP3-specific kinases using the respective inhibitors of MAPKs and CDKs. The results showed that the JNK  
212 inhibitor SP600125 and MEK1/2 (mitogen-activated protein kinase kinase 1/2) inhibitor PD184352 caused a

213 marked decrease in BNIP3 phosphorylation and an increase in the dephosphorylated forms of BNIP3. Cell  
214 cycle-related inhibitors, such as roscovitine (a selective CDK inhibitor), did not significantly affect the features  
215 of BNIP3 protein bands, suggesting that BNIP3 is not a phosphorylation substrate of CDKs. Another MAPK  
216 inhibitor, SB203580 (a specific p38-MAPK inhibitor), did not have an apparent impact on the BNIP3 protein  
217 bands. Additionally, neither K252c nor Bis I (selective PKC inhibitors) nor TBB (a selective CK2 inhibitor)  
218 affected the features of BNIP3 protein bands (Fig. 4A), although PKC and CK2 have ever been reported to be  
219 related to phosphorylation of BNIP3 or other mitophagy receptors (Chen *et al.*, 2014; Graham *et al.*, 2007;  
220 Kanki *et al.*, 2013; Zhu *et al.*, 2013). We then combined SP600125 or PD184352 and OA to treat cells and  
221 observed that the upshift of BNIP3 protein bands caused by OA was partly reversed by SP600125 but not  
222 affected by PD184352 (Fig. EV3A). Moreover, two different JNK inhibitors, SP600125 and JNK-IN-8, could  
223 reduce BNIP3 phosphorylation under normoxia or hypoxia (Fig. 4B). The above results suggest that JNK may  
224 be the potential kinase for BNIP3. We further determined the effect of SP600125 on the phosphorylation of  
225 BNIP3 at Ser 60/Thr 66 in cells expressing WT or S60/T66A mutant. Consistent with changes of BNIP3 bands,  
226 the phosphorylation of WT but not S60/T66A mutant BNIP3 was affected by SP600125 (Fig. 4C), suggesting  
227 that the Ser 60/Thr 66 residue in BNIP3 may be the target site for JNK recognition.

228 Given that SP600125 is a broad-spectrum JNK inhibitor for JNK1, JNK2, and JNK3 and PD184352 inhibits  
229 ERK1/2 and ERK5 activities, we knocked them down with their respective siRNA to identify the specific  
230 BNIP3 kinases. When *Jnk1*, *Jnk2*, *Jnk3*, *Erk1*, *Erk2* or *Erk5* was separately knocked down with the  
231 corresponding siRNA, only *Jnk1* and *Jnk2* knockdown resulted in a significant downshift of BNIP3 bands (Fig.  
232 EV3B), which illustrates that JNK1 and JNK2 are the potential kinases for BNIP3 phosphorylation.  
233 Subsequently, we confirmed that JNK1 and JNK2, but not JNK3, are the kinases of BNIP3, since knockdown of  
234 *Jnk1*, *Jnk2* but not *Jnk3* directly resulted in a decrease in BNIP3 phosphorylation levels (Fig. 4D). To investigate  
235 whether JNK1 and JNK2 interact with BNIP3 in cells, we carried out a co-IP assay after cells were co-  
236 transfected with Flag-BNIP3 and HA-JNK1 or HA-JNK2. The results showed that JNK1 had a stronger binding  
237 affinity with BNIP3 than JNK2 (Fig. 4E). Hence, we used constitutively active (CA) or dominant negative (DN)  
238 JNK1 to further test the interaction of JNK1 with BNIP3. As expected, BNIP3 interacted with CA-JNK1 but not  
239 DN-JNK1 (Fig. 4F), demonstrating that the kinase activity of JNK1 is required for the interaction with BNIP3.  
240 To elucidate whether Ser 60/Thr 66 of BNIP3 is the phosphorylation site for JNK1, we knocked down *JNK1*  
241 and *JNK2* and then overexpressed CA-JNK1 or DN-JNK1 to examine their effects on the phosphorylation of  
242 BNIP3 WT or the S60/T66A mutant. The results showed that CA-JNK1 phosphorylated BNIP3 WT instead of  
243 the S60/T66A mutant and that DN-JNK1 had no significant effects on phosphorylation (Fig. EV3C), suggesting  
244 that Ser 60/Thr 66 of BNIP3 is the phosphorylation site for JNK1. Consistent with this, the effect of JNK1  
245 activity on phosphorylation of BNIP3 was verified by using a phospho-specific antibody (Fig. 4G). Taken  
246 together, these data demonstrate that JNK1/2 is a kinase that phosphorylates BNIP3.

### 247 **Phosphorylation of BNIP3 S60/T66 by JNK1/2 enhances mitophagy via impeding BNIP3 proteasomal** 248 **degradation**

249 To investigate the role of JNK1/2-mediated BNIP3 phosphorylation, we first examined the effects of *Jnk1* and  
250 *Jnk2* knockdown on BNIP3 phosphorylation and mitophagy. Western blot analysis revealed that knockdown of  
251 *Jnk1* and *Jnk2* under both normoxic and hypoxic conditions obviously reduced BNIP3 phosphorylation and

252 simultaneously inhibited mitophagy (Fig. 5A). To further clarify whether phosphorylation of BNIP3 at Ser  
253 60/Thr 66 by JNK1/2 is involved in the regulation of mitophagy, we compared the roles of BNIP3 WT and the  
254 S60/T66A mutant in the induction of mitophagy when CA-JNK1 or DN-JNK1 was ectopically overexpressed.  
255 Fluorescence images showed that overexpression of CA-JNK1 stimulated the formation of GFP-LC3 puncta and  
256 reduced the number of mitochondria in BNIP3 WT cells but not in S60/T66A-expressing cells, while  
257 overexpression of DN-JNK1 was ineffective for the induction of mitophagy (Fig. 5B and Fig. EV4).  
258 Furthermore, a rescue experiment demonstrated that CA-JNK1 instead of DN-JNK1 restored the BNIP3-LC3  
259 interaction attenuated by *JNK1* and *JNK2* knockdown in WT but not in the S60/T66A mutant cells (Fig. 5C).  
260 Taken together, these results consistently demonstrate that JNK1/2 promotes mitophagy by phosphorylating  
261 BNIP3 at Ser 60/Thr 66.

262 In addition to enhancement of the interaction between BNIP3 and LC3 by JNK1/2, we also wondered  
263 whether JNK1/2 is directly involved in regulation of BNIP3 stability via phosphorylation of the Ser 60/Thr 66  
264 residue, since the phosphorylation of BNIP3 Ser 60/Thr 66 was shown to improve its stability. Therefore, to  
265 determine whether JNK1/2 regulates BNIP3 stability via the Ser 60/Thr 66 site, we examined the effects of  
266 JNK1 activity on the stability of BNIP3 after cells were co-transfected with the CA-JNK1 or DN-JNK1 and  
267 BNIP3 WT or mutant expression plasmids and then CHX was added to inhibit new protein synthesis. The  
268 results clearly showed that compared with BNIP3 WT without JNK1 stimulation, CA-JNK1 increased the  
269 stability of BNIP3, similar to that of S60D or S60E, while DN-JNK1 did not affect the stability of BNIP3 WT.  
270 On the other hand, neither CA-JNK1 nor DN-JNK1 altered the effect of the phosphorylation-disabled S60/T66A  
271 mutant on BNIP3 stability (Fig. 5D, E), indicating that JNK1/2 regulation of BNIP3 stability is achieved by  
272 phosphorylation of the Ser 60/Thr 66 residue. To further determine whether JNK1/2 regulation of BNIP3  
273 stability involves the ubiquitin-proteasome pathway, we co-transfected cells with CA-JNK1 or DN-JNK1,  
274 BNIP3 and Ub and then conducted a Co-IP assay. We were pleasantly surprised to find that CA-JNK1  
275 significantly reduced the conjugation of ubiquitin to BNIP3 (Fig. 5F). Altogether, our results suggest that  
276 JNK1/2 improves the stability of BNIP3 by preventing its degradation via the ubiquitin-proteasome pathway.  
277 Thus, we propose that phosphorylation at the Ser 60/Thr 66 residue by JNK1/2 impedes the degradation of  
278 BNIP3 via the ubiquitin-proteasome pathway and that the stabilized BNIP3 promotes mitophagy via enhanced  
279 interaction with LC3.

### 280 **PP1/2A dephosphorylate BNIP3 and suppresses mitophagy by facilitating BNIP3 proteasomal** 281 **degradation**

282 Since dephosphorylation of BNIP3 is negatively correlated with mitophagy (Fig. 1G and Fig. 2F), we next  
283 wondered which protein phosphatase is responsible for dephosphorylation of BNIP3. Given that OA reversed  
284 the downward shift of the BNIP3 protein bands (Fig. 1F), which indicates that OA blocks dephosphorylation of  
285 BNIP3, and more importantly, OA is a potent inhibitor of the protein phosphatases PP1 and PP2A (Shi, 2009),  
286 We therefore speculate that PP1 and PP2A may be the phosphatases of BNIP3. Comparing calyculin A (Cal A)  
287 and OA, which are more potent inhibitors of PP1 and PP2A, respectively, we observed both Cal A and OA are  
288 all effective in preventing BNIP3 dephosphorylation (Fig. 6A). To determine which catalytic subunit of PP1 or  
289 PP2A to play the key role in regulation of BNIP3 dephosphorylation, we found when all catalytic subunits of  
290 PP1 or PP2A were knocked down at the same time, the effect of PP1 or PP2A knockdown was manifested, in



291 other words, inhibition of PP1 or PP2A expression increased the level of BNIP3 phosphorylation after cells  
292 were exposed to hypoxia instead of normoxia (Fig. 6B). Additionally, we also noticed that the role of PP1 is  
293 slightly stronger than PP2A. Therefore, we focused on determining whether PP1 interacts with BNIP3 and  
294 affects BNIP3-mediated mitophagy. We co-transfected HeLa cells with PPP1CA or PPP1CC (two main  
295 catalytic subunits of PP1) combined with BNIP3 plasmids and observed the effect of PPP1CA/C on BNIP3  
296 phosphorylation and the interaction between them using a co-IP assay. As expected, PPP1CA/C caused  
297 remarkable dephosphorylation of BNIP3 when PPP1CA/C was overexpressed in cells. In the meantime, when  
298 BNIP3 was immunoprecipitated with a Flag antibody, PPP1CA/C was also pulled down, demonstrating an  
299 interaction between PP1 and BNIP3 in cells (Fig. 6C). To examine the effect of PP1 on BNIP3-mediated  
300 mitophagy, we transfected cells with BNIP3 and a concentration gradient of PPP1CA/C. Then, we found that  
301 with an increase in PPP1CA/C concentration, the phosphorylation of BNIP3 was significantly reduced, and  
302 mitophagy was inhibited synchronously (Fig. 6D). These data indicate that PPP1CA/C is a phosphatase that  
303 dephosphorylates BNIP3, which largely results in suppression of mitophagy.

304 As to how PP1/2A obstructs mitophagy, considering that phosphorylation of BNIP3 improved its stability  
305 and promoted mitophagy, we speculated that dephosphorylation of BNIP3 by PP1/2A might negatively regulate  
306 the stability of BNIP3, thus leading to failure of mitophagy induction. In addition, we have noticed that the  
307 highest concentration of PPP1CA/C leads to nearly complete disappearance of BNIP3, as shown in Fig. 6D,  
308 which greatly suggests a negative regulatory effect of PP1 on the stability of BNIP3. Accordingly, we tested the  
309 effect of PP1 on the stability of BNIP3 after cells were co-transfected with PPP1CA/C and BNIP3 and then  
310 treated with CHX or MG132. We observed an increase in BNIP3 degradation induced by CHX treatment in the  
311 pEGFP-C1 control, and the degradation of BNIP3 was exacerbated by PPP1CA/C but blocked by MG132 (Fig.  
312 6E), suggesting that PP1 accelerates BNIP3 degradation via the proteasome pathway. We further demonstrated  
313 that PP1 facilitated conjugation of BNIP3 with ubiquitin when cells were co-transfected with PPP1CA or  
314 PPP1CC and BNIP3 and Ub plasmids (Fig. 6F), suggesting that PP1 potentiates the degradation of BNIP3 via  
315 the ubiquitin-proteasome pathway. Collectively, our results demonstrate that PP1/2A is a phosphatase of BNIP3  
316 and suppresses BNIP3-mediated mitophagy, primarily due to accelerated BNIP3 degradation via the ubiquitin-  
317 proteasome pathway.

## 318 Discussion

319 Regulation of mitophagy under hypoxia is critical for cell fate and is related to whether cells adapt to hypoxia.  
320 BNIP3 is a mitophagy receptor that mediates mitophagy and is also a hypoxia-responsive protein that is highly  
321 upregulated under hypoxia, but how BNIP3 regulates mitophagy under hypoxia remains a challenging question.  
322 The key issue is that the fine regulation of BNIP3 under hypoxia, which involves the upstream modulation of  
323 BNIP3-mediated mitophagy, has not been uncovered. It has been reported that overexpression of BNIP3 in  
324 hypoxia promotes its interaction with BCL-2 or BCL-XL, which leads to the release of Beclin-1 from BCL-  
325 2/BCL-XL binding and hence to autophagy initiation (Bellot *et al.*, 2009; Zhang *et al.*, 2008). Some studies  
326 have also noted that phosphorylation of BCL-2/BCL-XL by JNK promotes the disassociation of Beclin-1 from  
327 BCL-2/BCL-XL (Klein *et al.*, 2015; Wei *et al.*, 2008a; Wei *et al.*, 2008b; Zhong *et al.*, 2017). However, following  
328 autophagy initiation in the same context, how damaged or unwanted mitochondria are recognized, thereby  
329 inducing mitophagy, has not been elucidated. Moreover, although phosphorylation of BNIP3 at Ser 17/24 has

330 been shown to enhance its binding to LC3 and promote mitophagy (Zhu *et al.*, 2013), thus far, no kinase or  
331 phosphatase that targets BNIP3 Ser 17/24 has been found.

332 In this study, we first found that overexpression of BNIP3 under hypoxia is not the unique key to  
333 determining mitophagy. Because even when BNIP3 was overexpressed in cells exposed to 0.3% O<sub>2</sub> for more  
334 than 12 h, mitophagy was still suppressed (Fig. 1G). Instead, we demonstrated that phosphorylation of BNIP3 is  
335 required for the induction of mitophagy, which facilitates cell survival under hypoxia. Subsequently, we  
336 identified Ser 60/Thr 66 as a new phosphorylation site in BNIP3. To our surprise, phosphorylation of BNIP3 at  
337 Ser 60/Thr 66 is not only essential for mitophagy induction but also for the stability of BNIP3. Our results  
338 further show that BNIP3 phosphorylation at the Ser 60/Thr 66 residue hinders its degradation via the ubiquitin-  
339 proteasome pathway. Based on these data, we believe that inhibition of BNIP3 proteasomal degradation favors  
340 its mediation of mitophagy. In other words, induction of mitophagy is hampered by BNIP3 degradation, similar  
341 to the result of *Bnip3* knockdown with siRNA. Overall, mitophagy is largely dependent on the phosphorylation  
342 of BNIP3 at Ser 60/Thr 66.

343 We next identified JNK1/2 as the kinase of BNIP3 at Ser 60/Thr 66, which contributes to induction of  
344 mitophagy by enhancing the BNIP3-LC3 interaction. Since JNK also activates BCL-2, which facilitates the  
345 dissociation of Beclin-1 from BCL-2 (Wei *et al.*, 2008a; Wei *et al.*, 2008b), we explored whether  
346 phosphorylation at Ser 60/Thr 66 by JNK1/2 is involved in the interaction of BNIP3 with BCL-2. Unfortunately,  
347 we found that phosphorylation of BNIP3 at Ser 60/Thr 66 is not associated with binding of BCL-2, as the  
348 S60/T66A mutant did not alter the interaction of BNIP3 with BCL-2 (Fig. EV2B). However, this result does not  
349 rule out the possibility that other phosphorylation sites participate in the binding of BNIP3 to BCL-2.  
350 Additionally, we identified PP1 and PP2A as BNIP3 phosphatases, which block mitophagy by  
351 dephosphorylation of BNIP3. Dephosphorylation of BNIP3 by PP1/2A not only plays a negative regulatory role  
352 in the induction of mitophagy but also in the stability of BNIP3. Especially, the degradation of BNIP3 through  
353 the ubiquitin-proteasome pathway was significantly accelerated by dephosphorylation. It is a pity that we did  
354 not find an E3 ligase for BNIP3 that regulates its proteasomal degradation. However, we can still speculate on  
355 such a possibility that phosphorylation at the Ser 60/Thr 66 may block E3-mediated conjugation of ubiquitin to  
356 BNIP3, while dephosphorylation at the Ser 60/Thr 66 contributes to the ubiquitin conjugation and subsequent  
357 proteasomal degradation of BNIP3. In any case, we propose the hypothesis that BNIP3 phosphorylation at Ser  
358 60/Thr 66 by activated JNK1/2 under moderate hypoxia conditions (10% O<sub>2</sub> or early stages of 0.3% O<sub>2</sub>) blocks  
359 BNIP3 degradation via the ubiquitin-proteasome pathway, and then the stabilized and activated BNIP3 recruits  
360 LC3, thereby promoting mitophagy and cell survival; however, PP1/2A activated under severe hypoxia  
361 conditions (late stages of 0.3% O<sub>2</sub>) accelerates BNIP3 proteasomal degradation, which impairs the induction of  
362 mitophagy and causes cell death (Fig. 7).

363 In conclusion, we provide evidence that BNIP3 phosphorylation level is more critical for the induction of  
364 mitophagy than its total protein level, and that JNK1/2 and PP1/2A oppositely regulate the phosphorylation and  
365 stability of BNIP3 in response to different hypoxia. Future identification of an E3 ligase for BNIP3 and its  
366 regulation under hypoxia will be of great significance for revealing the comprehensive functions of BNIP3.  
367 Further study on the biological significance of coordinated regulation of BNIP3 by JNK1/2 and PP1/2A under  
368 hypoxic conditions could provide insight into therapeutic strategies against hypoxia-related diseases.

369

## 370 **Materials and Methods**

### 371 **Cell culture and hypoxia treatment**

372 PC12, HeLa and HEK293T cells were obtained from American Type Culture Collection (ATCC). Cells were  
373 cultured in Dulbecco's modified Eagle's medium (DMEM, HyClone, SH30081) supplemented with 1%  
374 penicillin-streptomycin (HyClone, SV30010) and 5% fetal bovine serum, 10% horse serum (Gibco) or 10% fetal  
375 bovine serum at 37 °C under 5% CO<sub>2</sub>. PC12 and HeLa cells stably expressing Flag-BNIP3 were selected in  
376 media containing 1 µg ml<sup>-1</sup> puromycin. For hypoxia treatment, cells were placed in an incubator (Thermo Fisher  
377 Scientific) at 37 °C with 20% O<sub>2</sub> and 5% CO<sub>2</sub> for 24 h, and then moved to a hypoxia chamber (0.3% O<sub>2</sub>, 5%  
378 CO<sub>2</sub> and 94.7% N<sub>2</sub> (Coy laboratory) or 10% O<sub>2</sub>, 5% CO<sub>2</sub> and 85% N<sub>2</sub> (Thermo Fisher Scientific).

### 379 **Reagents and antibodies**

380 Mitotracker (M7512) was purchased from Thermo Fisher Scientific; λ-PPase (P0753) was obtained from New  
381 England Biolabs; 3-MA (M9281), cycloheximide (01810), K252c (S3939), MG132 (M7449), okadaic acid  
382 (O8010) and TBB (T0826) were from Sigma-Aldrich; Bis I (S7208), JNK-IN-8 (S4901), PD184352 (S1020),  
383 Roscovitine (S1153), SB203580 (S1076) and SP600125 (S1460) were from Selleck; Calyculin A (1336) was  
384 purchased from Tocris.

385 The following antibodies were used for western blotting: anti-BNIP3 (1:1,000, mouse mAb, Abcam,  
386 ab10433), anti-p62 (1:10,000, mouse mAb, Abcam, ab56416), anti-phospho-BNIP3 (Ser 60, 1:400, rabbit pAb)  
387 was generated by Abclonal, anti-BCL-2 (1:1,000, mouse mAb, BD bioscience, 610538), anti-JNK1 (1:1,000,  
388 mouse mAb, Cell Signaling Technology, 3708), anti-JNK2 (1:1,000, rabbit mAb, Cell Signaling Technology,  
389 9258), anti-JNK3 (1:500, rabbit mAb, Cell Signaling Technology, 2305), anti-PP2A (1:1,000, rabbit pAb, Cell  
390 Signaling Technology, 2038), anti-p-MAPK/CDK substrates (1:500, rabbit mAb, Cell Signaling Technology,  
391 2325), anti-p-SAPK/JNK (1:1,000, rabbit pAb, Cell Signaling Technology, 9251), anti-SAPK/JNK (1:1,000,  
392 rabbit pAb, Cell Signaling Technology, 9252), anti-Flag (anti-DDDDK, 1:10,000, mouse mAb, MBL, M185-3),  
393 anti-Flag (anti-DDDDK, 1:2,000, rabbit pAb, MBL, PM020), anti-HIF-1α (1:1,000, mouse mAb, Novus  
394 Biologicals, NB100-105), anti-c-Myc (1:1,000, rabbit pAb, Santa Cruz, sc-789), anti-GFP (1:1,000, rabbit pAb,  
395 Santa Cruz, sc-8334), anti-HA (1:1,000, rabbit pAb, Santa Cruz, sc-805), anti-PP1 (1:1,000, mouse mAb, Santa  
396 Cruz, sc-7482), anti-TOMM20 (1:5,000, rabbit pAb, Santa Cruz, sc-11415), anti-LC3B (1:4,000, rabbit pAb,  
397 Sigma-Aldrich, L7543) and anti-β-actin (1:10,000, mouse mAb, Sigma-Aldrich, A5316). The following HRP-  
398 conjugated secondary antibodies were used for western blotting: goat anti-mouse IgG (1:2,000, MBL, 330) and  
399 goat anti-rabbit IgG (1:2,000, MBL, 458). The following antibodies were used for immunofluorescence  
400 experiments: anti-Flag (anti-DDDDK, 1:1,000, mouse mAb, MBL, M185-3), anti-Flag (anti-DDDDK, 1:1,000,  
401 rabbit pAb, MBL, PM020), anti-HA (1:1,000, mouse mAb, MBL, M180-3) and anti-TOMM20 (1:1,000, rabbit  
402 pAb, Santa Cruz, sc-11415). The fluorescent secondary antibodies were conjugated with either Alexa Fluor 594  
403 (1:1,000, anti-rabbit, Cell Signaling Technology, 8889) or Alexa Fluor 647 (1:1,000, anti-mouse, Cell Signaling  
404 Technology, 4410). Mouse IgG (C2118) was purchased from Applygene.

### 405 **Plasmids, transfection and virus production**

406 BNIP3 was amplified from rat cDNA (NCBI RefSeq NM\_053420.3) via PCR and fused with Flag via an N-  
407 terminal epitope tag. Then, Flag-tagged BNIP3 was cloned into a pcDNA3.1 vector (Thermo Fisher Scientific)  
408 or a pCDH vector (System Biosciences, CD550A-1). JNK1 (NCBI RefSeq NM\_001323302.1) and JNK2  
409 (NCBI RefSeq NM\_002752.4) were amplified from human cDNA via PCR and cloned into a pXJ40-HA vector.  
410 Site-directed mutants and siRNA-resistant constructs were performed using kits according to standard methods  
411 (SBS Genetech). The primer information can be found in Table S1. All the plasmids were verified by DNA  
412 sequencing. pXJ40-HA, pXJ40-Myc-Ub, pEGFP-C1-PPP1CA, pEGFP-C1-PPP1CC and pEGFP-C1-LC3B (Xu  
413 *et al*, 2018) were gifts from Q. Xia and T. Zhou (State Key Laboratory of Proteomics, Beijing). pSR $\alpha$ -HA-  
414 MKK7-JNK1 (JNK1<sup>CA</sup>) and pSR $\alpha$ -HA-JNK1-APF (JNK1<sup>DN</sup>) (Thr-Pro-Tyr replaced with Ala-Pro-Phe) (Wang  
415 *et al*, 2011) were gifts from J-Y. Zhang (Institute of Cognition and Brain Sciences, Beijing).

416 Transfection of plasmids was performed using Lipofectamine 2000 reagent (Thermo Fisher Scientific)  
417 according to the manufacturer's instructions. For RNA interference, cells were transfected with negative control  
418 or with pre-designed siRNAs (Sigma-Aldrich or Ribobio) targeting the indicated genes (Table S2) at a final  
419 concentration of 50 nM or 100 nM using X-tremeGene siRNA transfection reagent (Roche, 04476093001)  
420 according to the manufacturer's instructions. For lentivirus production, pCDH-Flag-BNIP3 was co-transfected  
421 with psPAX2 and pMD2.G plasmids into HEK293T cells.

#### 422 **Transmission electron microscopy**

423 After PC12 cells were exposed to different oxygen concentrations for 24 h, the cells were collected by digestion  
424 and centrifugation, washed with PBS, and then fixed with 3% glutaraldehyde in 0.075 M PBS (pH 7.4) at 4 °C  
425 for 2 h. After fixation, the cells were washed three times with PBS, post-fixed in 1% OsO<sub>4</sub> at 4 °C for 1 h, and  
426 washed in PBS for 15 min. Cell precipitates were dehydrated through a graded series of 50% to 90% ethanol,  
427 which was then replaced with 90% to 100% acetone. The cultures were soaked and then embedded in acrylic  
428 resin. Next, 60-nm ultrathin sections were collected on copper grids and stained with uranyl acetate for 10 min  
429 and lead citrate for 10 min. The samples were visualized and photographed using a HITACHI H-7650  
430 transmission electron microscope at 80 kV.

#### 431 **Confocal imaging of living cells**

432 For mitophagy analysis, PC12 cells were transfected with plasmid encoding GFP-LC3 for 48 h and then  
433 exposed to hypoxia or normoxia for an additional 24 h. Next, mitochondria were marked with 50 nM  
434 MitoTracker Red CMXRos at 37°C under 5% CO<sub>2</sub> for 30 min, and then, the cells were washed with PBS. Cell  
435 images were captured with a confocal microscope (Carl Zeiss). Autophagosome formation and mitochondrial  
436 co-localization were analyzed using ImageJ software (NIH). The co-localization of autophagosome and  
437 mitochondria was quantified by counting more than 40 cells.

#### 438 **Immunofluorescence microscopy**

439 HeLa cells were grown on glass coverslips. After the indicated treatment, cells were fixed with 4%  
440 paraformaldehyde (PFA) for 15 min at room temperature, washed three times with PBS, permeabilized with  
441 0.5% Triton X-100 in PBS for 30 min and blocked with 5% goat serum for 1 h at room temperature. Cells were  
442 then incubated with primary antibodies diluted in goat serum overnight at 4°C, followed by incubation with

443 secondary antibodies diluted in goat serum for 1 h. All images were captured with a confocal microscope. For  
444 quantification of no or few TOMM20, more than 150 cells from 30 different fields were counted.

#### 445 **Real-time quantitative PCR**

446 Total RNA was isolated from cells using Trizol<sup>®</sup> reagent (Thermo Fisher Scientific, 15596-026) according to  
447 the manufacturer's protocol. An aliquot of 1 µg of total mRNA was reversely transcribed at 42°C for 1 h in a 10  
448 µl reaction mixture containing oligo (dT) 18 primer, M-MLV reverse transcriptase and RNase inhibitor  
449 (TaKaRa, D2639A). Q-PCR was performed in triplicate with Power SYBR<sup>®</sup> Green (Thermo Fisher Scientific,  
450 4367659) on a Step-one Plus system (Thermo Fisher Scientific). The primer information can be found in Table  
451 S3.

#### 452 **SDS-PAGE and western blotting**

453 Cells were lysed in ice-cold RIPA buffer (50 mM Tris-HCl (pH 7.4), 150 mM NaCl, 1% NP-40, and 0.1% SDS)  
454 containing a protease inhibitor cocktail (Roche, 11697498001). Equal amounts of protein were separated on  
455 10%-15% SDS-PAGE gels and transferred to PVDF membranes (Roche, 03010040001). The membranes were  
456 probed with the indicated primary antibodies followed by the appropriate HRP-conjugated secondary antibodies.  
457 The protein content was determined with a chemiluminescence (ECL) assay kit (Bio-Rad, 1705060).

#### 458 **Lambda phosphatase assay**

459 PC12 cells were seeded in 60-mm dishes. After the indicated treatment, cells were washed with ice-cold PBS  
460 and lysed in RIPA buffer containing protease inhibitor cocktail. After centrifugation at 13,200 g for 15 min at  
461 4°C, supernatant fractions containing equal amounts of protein (50 µg) were incubated with lambda phosphatase  
462 and the phosphatase buffer for 1 h at 37°C. Samples were boiled and subjected to SDS-PAGE and western  
463 blotting.

#### 464 **Immunoprecipitation**

465 After transfection with the indicated plasmids, HeLa cells were collected and lysed in 1 ml of lysis buffer (20  
466 mM Tris-HCl, 150 mM NaCl, 1 mM Na<sub>2</sub>-EDTA, 1 mM EGTA, 1% Triton X-100, 2.5 mM sodium  
467 pyrophosphate, 1 mM β-glycerophosphate, 1 mM Na<sub>3</sub>VO<sub>4</sub>, and 1 µg ml<sup>-1</sup> leupeptin, Cell Signaling Technology,  
468 9803) containing protease inhibitor cocktail. After centrifugation at 13,200 g for 15 min at 4°C, equal amounts  
469 of cell lysates were preincubated with mouse IgG (Applygene, C2118) and Protein A/G agarose beads (Santa  
470 Cruz, sc-2003) for 4 h at 4°C and then clarified by centrifugation. Supernatant fractions were  
471 immunoprecipitated with 2 µg anti-Flag antibody (MBL, M185-3) and 40 µl Protein A/G agarose beads  
472 overnight at 4°C. After being washed five times, the immunoprecipitates were boiled in Laemmli sample buffer  
473 (Bio-Rad, 1610737) for 5 min. Samples were analyzed via SDS-PAGE and western blotting.

#### 474 **Degradation and ubiquitylation assays**

475 BNIP3 degradation was estimated using cycloheximide (CHX) chase assays. Cells were treated with 20 µg ml<sup>-1</sup>  
476 CHX for the indicated time, and cell lysates were subjected to SDS-PAGE and western blotting. For the

477 ubiquitination assay, cells were lysed in RIPA buffer containing protease inhibitor cocktail and boiled for 10  
478 min. After being clarified by centrifugation, cell lysates were precleared with mouse IgG and  
479 immunoprecipitated with an anti-Flag antibody and Protein A/G agarose beads. Immunoprecipitated Flag-  
480 BNIP3 was detected via SDS-PAGE and western blotting.

#### 481 **Statistical analysis**

482 The statistical data are expressed as the mean  $\pm$  SEM. Statistical significant differences were assessed using one-  
483 way analysis of variance (ANOVA) followed by Tukey's multiple comparison test (Fig. 1B, Fig. 1C, Fig. 2D,  
484 Fig. 2E, Fig. 2G, Fig. 2H, Fig. 3G, Fig. 4D, Fig. 5F, Fig. 6F, Fig. EV1A, Fig. EV2A, Fig. EV2B) or Dunnett's  
485 multiple comparison test (Fig. 1G, Fig. EV1B) or two-way ANOVA with Tukey's multiple comparison test (Fig.  
486 1D, Fig. 2F, Fig. 4B, Fig. 4C, Fig. 4G, Fig. 5A, Fig. 5B, Fig. 5C, Fig. 6A, Fig. 6B, Fig. 6D, Fig. 6E, Fig. EV3C).  
487 Differences between compared groups were considered statistically significant at  $P$  values  $< 0.05$ . \* $P < 0.05$ , \*\* $P$   
488  $< 0.01$  and \*\*\* $P < 0.001$  versus the corresponding controls are indicated. All statistical analyses were done  
489 using GraphPad Prism 8 software.

#### 490 **Acknowledgement**

491 We thank Prof. Q. Xia and T. Zhou (State Key Laboratory of Proteomics, Beijing) for providing the pXJ40-HA,  
492 pXJ40-Myc-Ub, pEGFP-C1-LC3B, pEGFP-C1-PPP1CA, and pEGFP-C1-PPP1CC plasmids and Prof. J-Y.  
493 Zhang (Institute of Cognition and Brain Sciences, Beijing) for providing the pSR $\alpha$ -HA-MKK7-JNK1 (JNK1<sup>CA</sup>)  
494 and pSR $\alpha$ -HA-JNK1-APF (JNK1<sup>DN</sup>) plasmids. This work was supported by grants from the National Natural  
495 Science Foundation of China (31271211, 31771321 and 81971781 to L.-Y. Wu), the Key Program of National  
496 Nature Sciences Foundation of China (81430044 to L.-L. Zhu) and the National Basic Research Program of  
497 China (2011CB910800 to L.-L. Zhu and 2012CB518200 to M. Fan).

#### 498 **Author contributions**

499 L.-Y. Wu, L.-L. Zhu and M. Fan supervised the project. L.-Y. Wu and Y.-L. He designed and performed the  
500 majority of the experiments. S.-H. Gong and M. Zhao contributed to the immunofluorescence analyses. X. Chen  
501 and T. Zhao helped to prepare cell lines and reagents. Y.-Q. Zhao provided technical support. L.-Y. Wu and Y.-  
502 L. He interpreted the data and wrote the manuscript, with the help of all the authors.

#### 503 **Conflict of interest**

504 The authors declare that they have no conflict of interest.

505

506 **References**

- 507 Ashrafi G, Schwarz TL (2013) The pathways of mitophagy for quality control and clearance of mitochondria.  
508 *Cell Death Differ* 20: 31-42
- 509 Bellot G, Garcia-Medina R, Gounon P, Chiche J, Roux D, Pouyssegur J, Mazure NM (2009) Hypoxia-induced  
510 autophagy is mediated through hypoxia-inducible factor induction of BNIP3 and BNIP3L via their BH3  
511 domains. *Mol Cell Biol* 29: 2570-2581
- 512 Bruick RK (2000) Expression of the gene encoding the proapoptotic Nip3 protein is induced by hypoxia. *Proc*  
513 *Natl Acad Sci USA* 97: 9082-9087
- 514 Chen G, Han Z, Feng D, Chen Y, Chen L, Wu H, Huang L, Zhou C, Cai X, Fu C *et al* (2014) A regulatory  
515 signaling loop comprising the PGAM5 phosphatase and CK2 controls receptor-mediated mitophagy. *Mol Cell*  
516 54: 362-377
- 517 Chen G, Ray R, Dubik D, Shi L, Cizeau J, Bleackley RC, Saxena S, Gietz RD, Greenberg AH (1997) The E1B  
518 19K/Bcl-2-binding protein Nip3 is a dimeric mitochondrial protein that activates apoptosis. *J Exp Med* 186:  
519 1975-1983
- 520 Chourasia AH, Tracy K, Frankenberger C, Boland ML, Sharifi MN, Drake LE, Sachleben JR, Asara JM,  
521 Locasale JW, Karczmar GS *et al* (2015) Mitophagy defects arising from BNip3 loss promote mammary tumor  
522 progression to metastasis. *EMBO Rep* 16: 1145-1163
- 523 Dikic I, Elazar Z (2018) Mechanism and medical implications of mammalian autophagy. *Nat Rev Mol Cell Biol*  
524 19: 349-364
- 525 Diwan A, Krenz M, Syed FM, Wansapura J, Ren X, Koesters AG, Li H, Kirshenbaum LA, Hahn HS, Robbins J  
526 *et al* (2007) Inhibition of ischemic cardiomyocyte apoptosis through targeted ablation of Bnip3 restrains  
527 postinfarction remodeling in mice. *J Clin Invest* 117: 2825-2833
- 528 Geisler S, Holmstrom KM, Skujat D, Fiesel FC, Rothfuss OC, Kahle PJ, Springer W (2010) PINK1/Parkin-  
529 mediated mitophagy is dependent on VDAC1 and p62/SQSTM1. *Nat Cell Biol* 12: 119-131
- 530 Graham RM, Thompson JW, Wei J, Bishopric NH, Webster KA (2007) Regulation of Bnip3 death pathways by  
531 calcium, phosphorylation, and hypoxia-reoxygenation. *Antioxid Redox Signal* 9: 1309-1315
- 532 Guo K, Searfoss G, Krolkowski D, Pagnoni M, Franks C, Clark K, Yu KT, Jaye M, Ivashchenko Y (2001)  
533 Hypoxia induces the expression of the pro-apoptotic gene BNIP3. *Cell Death Differ* 8: 367-376
- 534 Hamacher-Brady A, Brady NR (2016) Mitophagy programs: mechanisms and physiological implications of  
535 mitochondrial targeting by autophagy. *Cell Mol Life Sci* 73: 775-795
- 536 Hanna RA, Quinsay MN, Orogo AM, Giang K, Rikka S, Gustafsson AB (2012) Microtubule-associated protein  
537 1 light chain 3 (LC3) interacts with Bnip3 protein to selectively remove endoplasmic reticulum and  
538 mitochondria via autophagy. *J Biol Chem* 287: 19094-19104
- 539 Heo JM, Ordureau A, Paulo JA, Rinehart J, Harper JW (2015) The PINK1-PARKIN Mitochondrial  
540 Ubiquitylation Pathway Drives a Program of OPTN/NDP52 Recruitment and TBK1 Activation to Promote  
541 Mitophagy. *Mol Cell* 60: 7-20
- 542 Kane LA, Lazarou M, Fogel AI, Li Y, Yamano K, Sarraf SA, Banerjee S, Youle RJ (2014) PINK1  
543 phosphorylates ubiquitin to activate Parkin E3 ubiquitin ligase activity. *J Cell Biol* 205: 143-153
- 544 Kanki T, Kurihara Y, Jin X, Goda T, Ono Y, Aihara M, Hirota Y, Saigusa T, Aoki Y, Uchiyama T *et al* (2013)  
545 Casein kinase 2 is essential for mitophagy. *EMBO Rep* 14: 788-794

- 546 Kirkin V, Rogov VV (2019) A Diversity of Selective Autophagy Receptors Determines the Specificity of the  
547 Autophagy Pathway. *Mol Cell* 76: 268-285
- 548 Klein SR, Piya S, Lu Z, Xia Y, Alonso MM, White EJ, Wei J, Gomez-Manzano C, Jiang H, Fueyo J (2015) C-  
549 Jun N-terminal kinases are required for oncolytic adenovirus-mediated autophagy. *Oncogene* 34: 5295-5301
- 550 Koyano F, Okatsu K, Kosako H, Tamura Y, Go E, Kimura M, Kimura Y, Tsuchiya H, Yoshihara H, Hirokawa  
551 T *et al* (2014) Ubiquitin is phosphorylated by PINK1 to activate parkin. *Nature* 510: 162-166
- 552 Kubli DA, Gustafsson AB (2012) Mitochondria and mitophagy: the yin and yang of cell death control. *Circ Res*  
553 111: 1208-1221
- 554 Lazarou M, Sliter DA, Kane LA, Sarraf SA, Wang C, Burman JL, Sideris DP, Fogel AI, Youle RJ (2015) The  
555 ubiquitin kinase PINK1 recruits autophagy receptors to induce mitophagy. *Nature* 524: 309-314
- 556 Liu L, Feng D, Chen G, Chen M, Zheng Q, Song P, Ma Q, Zhu C, Wang R, Qi W *et al* (2012) Mitochondrial  
557 outer-membrane protein FUNDC1 mediates hypoxia-induced mitophagy in mammalian cells. *Nat Cell Biol* 14:  
558 177-185
- 559 Liu L, Sakakibara K, Chen Q, Okamoto K (2014) Receptor-mediated mitophagy in yeast and mammalian  
560 systems. *Cell Res* 24: 787-795
- 561 Ma X, Godar RJ, Liu H, Diwan A (2012) Enhancing lysosome biogenesis attenuates BNIP3-induced  
562 cardiomyocyte death. *Autophagy* 8: 297-309
- 563 Marino G, Niso-Santano M, Baehrecke EH, Kroemer G (2014) Self-consumption: the interplay of autophagy  
564 and apoptosis. *Nat Rev Mol Cell Biol* 15: 81-94
- 565 Mellor HR, Rouschop KM, Wigfield SM, Wouters BG, Harris AL (2010) Synchronised phosphorylation of  
566 BNIP3, Bcl-2 and Bcl-xL in response to microtubule-active drugs is JNK-independent and requires a mitotic  
567 kinase. *Biochem Pharmacol* 79: 1562-1572
- 568 Millhorn DE, Conforti L, Beitner-Johnson D, Zhu W, Raymond R, Filisko T, Kobayashi S, Peng M, Genter MB  
569 (1996) Regulation of ionic conductances and gene expression by hypoxia in an oxygen sensitive cell line. *Adv*  
570 *Exp Med Biol* 410: 135-142
- 571 Narendra DP, Jin SM, Tanaka A, Suen DF, Gautier CA, Shen J, Cookson MR, Youle RJ (2010) PINK1 is  
572 selectively stabilized on impaired mitochondria to activate Parkin. *PLoS Biol* 8: e1000298
- 573 Ney PA (2015) Mitochondrial autophagy: Origins, significance, and role of BNIP3 and NIX. *Biochim Biophys*  
574 *Acta* 1853: 2775-2783
- 575 Palikaras K, Lionaki E, Tavernarakis N (2018) Mechanisms of mitophagy in cellular homeostasis, physiology  
576 and pathology. *Nat Cell Biol* 20: 1013-1022
- 577 Pickrell AM, Youle RJ (2015) The roles of PINK1, parkin, and mitochondrial fidelity in Parkinson's disease.  
578 *Neuron* 85: 257-273
- 579 Rogov V, Dotsch V, Johansen T, Kirkin V (2014) Interactions between autophagy receptors and ubiquitin-like  
580 proteins form the molecular basis for selective autophagy. *Mol Cell* 53: 167-178
- 581 Rogov VV, Suzuki H, Marinkovic M, Lang V, Kato R, Kawasaki M, Buljubasic M, Sprung M, Rogova N,  
582 Wakatsuki S *et al* (2017) Phosphorylation of the mitochondrial autophagy receptor Nix enhances its interaction  
583 with LC3 proteins. *Sci Rep* 7: 1131
- 584 Scherz-Shouval R, Elazar Z (2011) Regulation of autophagy by ROS: physiology and pathology. *Trends*  
585 *Biochem Sci* 36: 30-38



586 Shi Y (2009) Serine/threonine phosphatases: mechanism through structure. *Cell* 139: 468-484

587 Sowter HM, Ratcliffe PJ, Watson P, Greenberg AH, Harris AL (2001) HIF-1-dependent regulation of hypoxic

588 induction of the cell death factors BNIP3 and NIX in human tumors. *Cancer Res* 61: 6669-6673

589 Wang J, Tang R, Lv M, Wang Q, Zhang X, Guo Y, Chang H, Qiao C, Xiao H, Li X *et al* (2011) Defective

590 anchoring of JNK1 in the cytoplasm by MKK7 in Jurkat cells is associated with resistance to Fas-mediated

591 apoptosis. *Mol Biol Cell* 22: 117-127

592 Wei Y, Pattingre S, Sinha S, Bassik M, Levine B (2008a) JNK1-mediated phosphorylation of Bcl-2 regulates

593 starvation-induced autophagy. *Mol Cell* 30: 678-688

594 Wei Y, Sinha S, Levine B (2008b) Dual role of JNK1-mediated phosphorylation of Bcl-2 in autophagy and

595 apoptosis regulation. *Autophagy* 4: 949-951

596 Wu W, Tian W, Hu Z, Chen G, Huang L, Li W, Zhang X, Xue P, Zhou C, Liu L *et al* (2014) ULK1 translocates

597 to mitochondria and phosphorylates FUNDC1 to regulate mitophagy. *EMBO Rep* 15: 566-575

598 Xu G, Li T, Chen J, Li C, Zhao H, Yao C, Dong H, Wen K, Wang K, Zhao J *et al* (2018) Autosomal dominant

599 retinitis pigmentosa-associated gene PRPF8 is essential for hypoxia-induced mitophagy through regulating

600 ULK1 mRNA splicing. *Autophagy* 14: 1818-1830

601 Yasuda M, Theodorakis P, Subramanian T, Chinnadurai G (1998) Adenovirus E1B-19K/BCL-2 interacting

602 protein BNIP3 contains a BH3 domain and a mitochondrial targeting sequence. *J Biol Chem* 273: 12415-12421

603 Youle RJ, Narendra DP (2011) Mechanisms of mitophagy. *Nat Rev Mol Cell Biol* 12: 9-14

604 Yuan Y, Zheng Y, Zhang X, Chen Y, Wu X, Wu J, Shen Z, Jiang L, Wang L, Yang W *et al* (2017)

605 BNIP3L/NIX-mediated mitophagy protects against ischemic brain injury independent of PARK2. *Autophagy*

606 13: 1754-1766

607 Zhang H, Bosch-Marce M, Shimoda LA, Tan YS, Baek JH, Wesley JB, Gonzalez FJ, Semenza GL (2008)

608 Mitochondrial autophagy is an HIF-1-dependent adaptive metabolic response to hypoxia. *J Biol Chem* 283:

609 10892-10903

610 Zhong L, Shu W, Dai W, Gao B, Xiong S (2017) Reactive Oxygen Species-Mediated c-Jun NH2-Terminal

611 Kinase Activation Contributes to Hepatitis B Virus X Protein-Induced Autophagy via Regulation of the Beclin-

612 1/Bcl-2 Interaction. *J Virol* 91: e00001-00017

613 Zhu Y, Massen S, Terenzio M, Lang V, Chen-Lindner S, Eils R, Novak I, Dikic I, Hamacher-Brady A, Brady

614 NR (2013) Modulation of serines 17 and 24 in the LC3-interacting region of Bnip3 determines pro-survival

615 mitophagy versus apoptosis. *J Biol Chem* 288: 1099-1113

616

617 **Figure Legends**

618 **Figure 1. BNIP3 phosphorylation is closely related to mitophagy.**

619 A Mitochondria morphology was analyzed via transmission electron microscopy after PC12 cells were exposed  
620 to 20% O<sub>2</sub>, 10% O<sub>2</sub> or 0.3% O<sub>2</sub> for 24 h. The red boxes indicate representative mitochondria exposed to  
621 different oxygen conditions. Scale bar, 500 nm.

622 B PC12 cells were treated the same as in (A), and mitophagy was identified and quantified by co-localization of  
623 autophagosomes (GFP-LC3, green) and mitochondria (Mitotracker, red). Scale bar, 10 μm. *n* = 40.

624 C PC12 cells were treated same as (A), BNIP3, TOMM20, LC3 and adaptor protein p62 were detected via  
625 western blot. *n* = 3.

626 D PC12 cells were transfected with negative control (NC) or *Bnip3* siRNA for 48 h and then exposed to  
627 different oxygen concentrations for 24 h. The levels of BNIP3 mitophagy related proteins were detected via  
628 western blot. *n* = 3.

629 E PC12 cells were exposed to different oxygen concentrations for 24 h or 0.3% O<sub>2</sub> for the indicated times. Cell  
630 lysates were treated with/without lambda phosphatase (λ-PPase) for 1 h, followed by western blot analysis.

631 F PC12 cells were exposed to 20% O<sub>2</sub> or 0.3% O<sub>2</sub> complemented with 0, 50, 100, 200, 500 nM okadaic acid  
632 (OA), and subjected to western blot.

633 G PC12 cells were exposed to 0.3% O<sub>2</sub> for the indicated times. Cell lysates were then immunoblotted for the  
634 indicated proteins. *n* = 3. The data are expressed as means ± SEM. \**P* < 0.05, \*\**P* < 0.01, \*\*\**P* < 0.001 versus  
635 the indicated group.

636 **Figure 2. Phosphorylation of BNIP3 at S60/T66 is necessary to promote mitophagy by enhancing its**  
637 **interaction with LC3.**

638 A Putative BNIP3 phosphorylation sites based on reported proteomics data (PhosphoSitePlus<sup>®</sup>) that are  
639 conserved across different species. Conserved serine and threonine residues are marked in red.

640 B, C HeLa cells were transfected with empty vector and Flag-BNIP3 plasmids encoding either wild-type (WT)  
641 or mutant BNIP3 constructs generated via site-directed mutagenesis. After 48 h of transfection, cell lysates were  
642 detected via western blotting with anti-Flag antibody. OA, okadaic acid.

643 D HeLa cells were transfected with empty vector, WT, S60A or S60/T66A mutant Flag-BNIP3 plasmids,  
644 phosphorylation of BNIP3 was detected via western blotting using a phosphospecific antibody against BNIP3 at  
645 Ser 60 (p-S60). *n* = 3.

646 E The phosphorylation level of BNIP3 at Ser 60 in PC12 cells was measured under 0.3% O<sub>2</sub> for the indicated  
647 time. *n* = 3.

648 F PC12 cells were treated with *Bnip3* siRNA and transfected with *Bnip3* siRNA-resistant WT or S60/T66A  
649 plasmids, and then cells were exposed to 20% O<sub>2</sub> (Normoxia) or 0.3% O<sub>2</sub> (Hypoxia) for 6 h, respectively.  
650 Mitophagy and the phosphorylation of BNIP3 were detected via western blotting. *n* = 3.

651 G HeLa cells were transfected with GFP-LC3 and empty vector, WT or the indicated Flag-BNIP3 mutants for  
652 48 h. Cell lysates were immunoprecipitated with anti-Flag antibody and then subjected to western blot analysis  
653 with the indicated protein antibodies. *n* = 3.

654 H HeLa cells were treated the same as in (G). The cells were then fixed and immunostained with Flag (blue)  
655 and TOMM20 (Red). The white boxes indicate cells with few mitochondria. Scale bars, 10  $\mu\text{m}$ . The data are  
656 expressed as means  $\pm$  SEM. \* $P < 0.05$ , \*\* $P < 0.01$ , \*\*\* $P < 0.001$  versus the indicated group.

657 **Figure 3 Phosphorylation of BNIP3 at S60/T66 is essential to improve its stability.**

658 A PC12 cells were exposed to 0.3%  $\text{O}_2$  supplemented with 200 nM okadaic acid (OA) for 9 h and then treated  
659 with 20  $\mu\text{g ml}^{-1}$  cycloheximide (CHX) for the indicated times (left panel) or with 100, 200 nM OA plus 10  $\mu\text{M}$   
660 MG132 for 6 h (right panel). Cell lysates were detected via western blotting using the indicated antibodies.  $n = 3$ .

661 B Quantification of degradation rate of BNIP3 in CHX chase experiments shown in (A).

662 C-F HeLa cells were transfected with plasmids encoding WT or the indicated BNIP3 mutants for 48 h and then  
663 treated with 20  $\mu\text{g ml}^{-1}$  CHX for 0 h, 6 h, or 12 h. BNIP3 expression was detected via western blotting. (D) and  
664 (F) are quantification of degradation rate of BNIP3 shown in (C) and (E), respectively.  $n = 3$ .

665 G HeLa cells were transfected with Myc-Ub and empty vector, WT or the indicated BNIP3 mutant for 48 h and  
666 treated with 10  $\mu\text{M}$  MG132 for 12 h. Cell lysates were boiled and immunoprecipitated with an anti-Flag  
667 antibody. The immune complexes were then analyzed via western blotting.  $n = 3$ . The data are expressed as  
668 means  $\pm$  SEM. \* $P < 0.05$ , \*\* $P < 0.01$ , \*\*\* $P < 0.001$  versus the indicated group.

669 **Figure 4. JNK1/2 is the kinase responsible for BNIP3 phosphorylation.**

670 A PC12 cells were treated with various kinase inhibitors, including 10  $\mu\text{M}$  PD184352 (MEK inhibitor), 10  $\mu\text{M}$   
671 SP600125 (JNK inhibitor), 10  $\mu\text{M}$  SB203580 (p38 inhibitor), 10  $\mu\text{M}$  Roscovitine (CDK inhibitor), 100  $\mu\text{M}$  TBB  
672 (CK2 inhibitor), 10  $\mu\text{M}$  K252c and 1  $\mu\text{M}$  Bis I (PKC inhibitor). Then, cell lysates were subjected to western  
673 blotting with the indicated antibodies. DMSO, dimethylsulfoxide.

674 B The phosphorylation of BNIP3 was detected via western blotting after PC12 cells were treated with JNK  
675 inhibitor SP600125 (10  $\mu\text{M}$ ) or JNK-IN-8 (10  $\mu\text{M}$ ) and exposed to 20%  $\text{O}_2$  (Normoxia) or 0.3%  $\text{O}_2$  (Hypoxia)  
676 for 6 h.  $n = 3$ .

677 C PC12 cells stably expressing WT or S60/T66A mutant Flag-BNIP3 were treated with DMSO or SP600125  
678 and followed by detection of phosphorylation of BNIP3.  $n = 3$ .

679 D After *Jnk* was knocked down with the indicated siRNA in PC12 cells, the levels of JNK protein and BNIP3  
680 phosphorylation were measured by western blotting.  $n = 3$ .

681 E, F HeLa cells were transfected with Flag-BNIP3 and HA-JNK1 or HA-JNK2 (E) or constitutively active  
682 JNK1 (HA-JNK1<sup>CA</sup>) (HA-MKK7-JNK1) or dominant negative JNK1 (HA-JNK1<sup>DN</sup>) (HA-JNK1-APF) (F) for 48  
683 h. Cell lysates were then immunoprecipitated with an anti-Flag antibody and detected by western blotting with  
684 an anti-HA or anti-Flag antibody.

685 G *Jnk1* and *Jnk2* knockdown PC12 cells were transfected with HA-JNK1<sup>CA</sup> or HA-JNK1<sup>DN</sup> mutants for 48 h,  
686 cell lysates were then analyzed via western blotting with the indicated antibodies.  $n = 3$ . The data are expressed  
687 as means  $\pm$  SEM. \* $P < 0.05$ , \*\* $P < 0.01$ , \*\*\* $P < 0.001$  versus the indicated group.

688 **Figure 5. Phosphorylation of BNIP3 at S60/T66 by JNK enhances mitophagy and impedes BNIP3**  
689 **proteasomal degradation.**

690 A PC12 cells were transfected with negative control (NC), *Jnk1* and *Jnk2* siRNA for 48 h, and cell lysates were  
691 subjected to western blot analysis with the indicated antibodies.  $n = 3$ .

692 B Flag-BNIP3 stably expressed HeLa cells that were transfected with plasmids encoding constitutively active  
693 (CA) or dominant negative (DN) HA-JNK1 and immunostained with HA (blue) and TOMM20 (Red). The  
694 percentage of cells with no or few TOMM20 was quantified. Scale bars, 10  $\mu\text{m}$ .  $n = 30$ .  
695 C HeLa cells were transfected with NC or *JNK1* and *JNK2* siRNA and plasmids encoding GFP-LC3. After 48 h,  
696 the cells were transfected with plasmids encoding wild-type (WT) or S60/66A Flag-BNIP3 and HA-JNK1<sup>CA</sup> or  
697 HA-JNK1<sup>DN</sup> for an additional 24 h. Cell lysates were immunoprecipitated with an anti-Flag antibody and  
698 examined via western blotting with the indicated antibodies.  $n = 3$ .  
699 D, E HeLa cells were co-transfected with constitutively active or dominant negative HA-JNK1 and BNIP3 WT  
700 (D, left) or the S60/T66A mutants (E, right). After transfection for 48 h, 20  $\mu\text{g ml}^{-1}$  CHX was added to the  
701 cultures for the indicated time, and the degradation of BNIP3 was detected via western blotting with the  
702 indicated antibodies and quantified, respectively.  $n = 3$ .  
703 F HeLa cells were co-transfected with Flag-BNIP3, Myc-Ub and constitutively active or dominant negative  
704 HA-JNK1 for 48 h, and 10  $\mu\text{M}$  MG132 was added 12 h before samples were collected. Cell lysates were boiled  
705 and immunoprecipitated with an anti-Flag antibody. The immune complexes were then analyzed via western  
706 blotting.  $n = 3$ . The data are expressed as means  $\pm$  SEM. \* $P < 0.05$ , \*\* $P < 0.01$ , \*\*\* $P < 0.001$  versus the  
707 indicated group.

708 **Figure 6. PP1 and PP2A are phosphatases for BNIP3 and suppresses mitophagy by accelerating BNIP3**  
709 **proteasomal degradation.**

710 A PC12 cells were treated with PP1 and PP2A inhibitors, Calyculin A (Cal A, 5 nM) and okadaic acid (OA,  
711 200 nM) and then exposed to 20% O<sub>2</sub> (Normoxia) or 0.3% O<sub>2</sub> (Hypoxia) for 24 h, the phosphorylation of BNIP3  
712 was detected via western blotting.  $n = 3$ .  
713 B PP1 and PP2A were knocked down with siRNA targeting their respective catalytic subunits, *Ppp1ca*, *Ppp1cb*,  
714 *Ppp1cc*, and *Ppp2ca*, *Ppp2cb*, and then exposed to 20% O<sub>2</sub> or 0.3% O<sub>2</sub> for 24 h, after that, western blotting was  
715 used to detect the phosphorylation of BNIP3.  $n = 3$ .  
716 C HeLa cells were co-transfected with GFP-Vector, GFP-PPP1CA or GFP-PPP1CC and Flag-BNIP3 for 48 h,  
717 and cell lysates were then immunoprecipitated with an anti-Flag antibody and subjected to western blotting with  
718 an anti-GFP or anti-Flag antibody.  
719 D HeLa cells were transfected with Flag-BNIP3 and GFP-Vector or increasing concentrations of GFP-  
720 PPP1CA/PPP1CC plasmids (0.25, 0.5, 1.25  $\mu\text{g ml}^{-1}$ ) for 48 h, and cell lysates were analyzed by western blotting  
721 with the indicated antibodies.  $n = 3$ .  
722 E HeLa cells were co-transfected with Flag-BNIP3 and GFP-Vector, GFP-PPP1CA or GFP-PPP1CC. At 48 h  
723 after transfection, the cells were treated with or without 20  $\mu\text{g ml}^{-1}$  CHX or 10  $\mu\text{M}$  MG132 for 12 h. The  
724 degradation of BNIP3 was assessed by western blotting with the indicated antibodies.  $n = 3$ .  
725 F HeLa cells were co-transfected with Flag-BNIP3, Myc-Ub and GFP-Vector or GFP-PPP1CA/GFP-PPP1CC  
726 for 48 h, and 10  $\mu\text{M}$  MG132 was added 12 h prior to sample collection. Cell lysates were boiled and  
727 immunoprecipitated with an anti-Flag antibody. The immune complexes were then analyzed via western  
728 blotting.  $n = 3$ . The data are expressed as means  $\pm$  SEM. \* $P < 0.05$ , \*\* $P < 0.01$ , \*\*\* $P < 0.001$  versus the  
729 indicated group.

730 **Figure 7. The hypothetical mechanism of BNIP3 phosphorylation-mediated mitophagy under hypoxia.**

731 In response to moderate hypoxia (10% O<sub>2</sub> or early stages of 0.3% O<sub>2</sub>), a generous amount of BNIP3 is  
732 phosphorylated at S60/T66 by JNK1/2, which blocks the conjugation of ubiquitin (Ub) to BNIP3, inducing  
733 mitophagy activation. In severe hypoxia (late stages of 0.3% O<sub>2</sub>), JNK1/2 is inactivated and BNIP3 is  
734 dephosphorylated by PP1 or PP2A, which leads to the recruitment of ubiquitin to BNIP3 and its degradation via  
735 the ubiquitin-proteasome pathway, suppressing the induction of mitophagy.

736 **Supporting Information for**

737 **BNIP3 phosphorylation by JNK1/2 promotes mitophagy via enhancing its stability**  
738 **under hypoxia**

739 Yun-Ling He<sup>1</sup>, Sheng-Hui Gong<sup>1</sup>, Xiang Cheng<sup>1</sup>, Ming Zhao<sup>1</sup>, Tong Zhao<sup>1</sup>, Yong-Qi Zhao<sup>1</sup>, Ming Fan<sup>1,2,3\*</sup>,  
740 Ling-Ling Zhu<sup>1,2\*\*</sup>, Li-Ying Wu<sup>1,4\*\*\*</sup>

741 <sup>1</sup>Department of Cognitive Sciences, Institute of Cognition and Brain Sciences, Beijing, 100850, China

742 <sup>2</sup>Co-Innovation Center of Neuroregeneration, Nantong University, Nantong, 226001, China

743 <sup>3</sup>Beijing Institute for Brain Disorder, Beijing, 102206, China

744 <sup>4</sup>State Key Laboratory of Proteomics, Beijing Proteome Research Center, Beijing Institute of Radiation  
745 Medicine, Beijing, 100850, China

746 \* Corresponding author. Tel: +86 10 66932333; Email: fanmingchina@126.com

747 \*\* Corresponding author. Tel: +86 10 66931315; Email: linglingzhu@hotmail.com

748 \*\*\* Corresponding author. Tel: +86 10 66930297; Email: liyingwu\_china@163.com

749

## 750 **Expanded View Figure legends**

### 751 **Figure EV1. Hypoxia induces mitophagy and phosphorylation of BNIP3.**

752 A PC12 cells were exposed to 20% O<sub>2</sub>, 10% O<sub>2</sub> or 0.3% O<sub>2</sub> for 24 h. Cells were identified by  
753 immunofluorescence staining with antibodies against β-actin (white outline) and TOMM20 (red), and nuclear  
754 DNA was marked using DAPI (blue). Scale bars, 10 μm. The percentage of cells with no or few TOMM20 are  
755 quantified. *n* = 3.

756 B HeLa cells were exposed to 0.3% O<sub>2</sub> for the indicated time, the levels of BNIP3 and mitophagy related  
757 proteins were detected via western blot. The data are expressed as means ± SEM. \**P* < 0.05, \*\**P* < 0.01, \*\*\**P* <  
758 0.001 versus the indicated group.

### 759 **Figure EV2. Phosphorylation of BNIP3 at S60/T66 is not necessary for its binding to BCL-2.**

760 A HeLa cells were transfected with empty vector, WT or the indicated mutated Flag-BNIP3, and then, the cell  
761 lysates were subjected to immunoprecipitation (IP) with an anti-Flag antibody. Phosphorylation of BNIP3 at  
762 S60/T66 was detected in the immune complexes via western blotting using an anti-phospho-MAPK/CDK  
763 substrate antibody. *n* = 3.

764 B HeLa cells were transfected with empty vector, WT or the indicated Flag-BNIP3 mutants for 48 h. Cell  
765 lysates were immunoprecipitated with the anti-Flag antibody and then subjected to western blot analysis with  
766 BCL-2 and Flag antibodies. *n* = 3. The data are expressed as means ± SEM. \**P* < 0.05, \*\**P* < 0.01, \*\*\**P* <  
767 0.001 versus the indicated group.

### 768 **Figure EV3. JNK1/2 is the kinase responsible for BNIP3 phosphorylation.**

769 A PC12 cells were treated with okadaic acid (OA) and PD184352 (left) or SP600125 (right) for 12 h and  
770 analyzed via western blotting with an anti-BNIP3 or anti-β-actin antibody.

771 B PC12 cells were transfected with negative control (NC) or the indicated siRNA for 48 h, and the mRNA  
772 levels of related genes (left) and BNIP3 expression (right) were detected by real-time PCR and western blotting,  
773 respectively. *n* = 9.

774 C *JNK1* and *JNK2* knockdown HeLa cells were transfected with WT or S60/T66A and HA-JNK1<sup>CA</sup> or HA-  
775 JNK1<sup>DN</sup> mutants, and 48 h post-transfection, cell lysates were immunoprecipitated with an anti-Flag antibody.  
776 The immune complexes were then analyzed via western blotting with the indicated antibodies. *n* = 3. The data  
777 are expressed as means ± SEM. \**P* < 0.05, \*\**P* < 0.01, \*\*\**P* < 0.001 versus the indicated group.

### 778 **Figure EV4. BNIP3 phosphorylation at S60/T66 by JNK1 enhances mitophagy.** Representative images of

779 GFP-LC3 puncta in Flag-BNIP3 stable stably expressed HeLa cells, co-transfected with plasmids encoding HA-  
780 JNK1. Cells were identified by immunofluorescence staining with antibodies against HA (blue) and Flag (red).  
781 Scale bars, 10 μm.

782

783 **Appendix**

784 **TABEL of CONTENTS**

785 **Appendix Table S1 The primer information for Site-directed mutagenesis and siRNA-resistant**  
786 **constructs.**

787 **Appendix Table S2 List of siRNA used in this study.**

788 **Appendix Table S3 Sequence of real-time PCR primer used in this study.**



789 **Table S1. The primer information for the site-directed mutagenesis and the siRNA-resistant constructs.**

| Plasmids name                | Forward primer                                             | Reverse primer                                          |
|------------------------------|------------------------------------------------------------|---------------------------------------------------------|
| S12A                         | 5'-<br>AGAACCTGCAGGGCGCCTGGGTAGAACT<br>GC-3'               | 5'-<br>GCAGTTCTACCCAGGCGCCCTGCAGGTTCT-3'                |
| S19A                         | 5'-<br>TAGAACTGCACTTCGCCAATGGGAATGG<br>GA-3'               | 5'-<br>TCCCATTCCTCCATTGGCGAAGTGCAGTTCT<br>A-3'          |
| S48A                         | 5'-<br>ATGCGCAGCATGAAGCTGGACGAAGCAG<br>CT-3'               | 5'-<br>AGCTGCTTCGTCCAGCTTCATGCTGCGCA<br>T-3'            |
| S56A                         | 5'-<br>GCAGCTCCAAGAGCGCTCACTGTGACAG<br>CC-3'               | 5'-<br>GGCTGTACAGTGAGCGCTCTTGGAGCT<br>GC-3'             |
| S60A                         | 5'-<br>GCTCTCACTGTGACGCCCCACCTCGCTCC<br>C-3'               | 5'-<br>GGGAGCGAGGTGGGGCGTCACAGTGAG<br>AGC-3'            |
| S60D                         | 5'-<br>GCTCTCACTGTGACGACCCACCTCGCTCC<br>C-3'               | 5'-<br>GGGAGCGAGGTGGGTTCGTACAGTGAGA<br>GC-3'            |
| S60E                         | 5'-<br>GCTCTCACTGTGACGAACCACCTCGCTCC<br>C-3'               | 5'-<br>GGGAGCGAGGTGGTTCGTACAGTGAGA<br>GC-3'             |
| T66A                         | 5'-<br>CACCTCGCTCCCAGGCACCACAAGATAC<br>CA-3'               | 5'-<br>TGGTATCTTGTGGTGCCTGGGAGCGAGGT<br>G-3'            |
| S79A                         | 5'-<br>GAAATAGACACCCACGCCTTTGGTGAGA<br>AAAA-3'             | 5'-<br>TTTTTCTCACCAAAGGCGTGGGTGTCTAT<br>TTC-3'          |
| S85/T86A                     | 5'-<br>GTGAGAAAAACGCCGCTCTGTCTGAGGA<br>AG-3'               | 5'-<br>CTTCCTCAGACAGAGCGGCGTTTTTCTCA<br>C-3'            |
| S88A                         | 5'-<br>GAAAAACAGCACTCTGGCTGAGGAAGAT<br>TATA-3'             | 5'-<br>TATAATCTTCCTCAGCCAGAGTGCTGTTTT<br>TC-3'          |
| T141/S142A                   | 5'-<br>GCATGAGAAACGCAGCCGTGATGAAGAA<br>AG-3'               | 5'-<br>CTTTCTTCATCACGGCTGCGTTTTCTCATGC<br>-3'           |
| <i>Bnip3</i> siRNA-resistant | 5'-<br>TTGGAAGGCGTTTAAACGACCAGTACGTC<br>CACTTTTGAGGATCC-3' | 5'-<br>GGATCCTCAAAGGTGGACGTAAGGTC<br>GTAAACGCCTTCCAA-3' |
| <i>Jnk1</i> siRNA-resistant  | 5'-<br>TCCTTGGCGAGATGGAGTATAAAGAAAA<br>CGTGGA-3'           | 5'-<br>TCCACGTTTTCTTTATACTCCATCTCGCCA<br>AGGA-3'        |

790

791 **Table S2. List of siRNA used in this study.**

| Gene name            | Species | Target Sequences           |
|----------------------|---------|----------------------------|
| <i>Bnip3</i>         | Rat     | 5'-CTGACAACCTTCCACTAGTA-3' |
| <i>Erk1 (Mapk3)</i>  | Rat     | 5'-CGGCTGAAGGAGCTGATCT-3'  |
| <i>Erk2 (Mapk1)</i>  | Rat     | 5'-GTGCTGTGTCTTCAAGAGC-3'  |
| <i>Erk5 (Mapk7)</i>  | Rat     | 5'-CCCTCAGGGAAGTGAAGAT-3'  |
| <i>Jnk1 (Mapk8)</i>  | Rat     | 5'-GCATGGGCTACAAGGAGAA-3'  |
| <i>JNK1 (MAPK8)</i>  | Human   | 5'-AGCTCCACCACCAAAGATC-3'  |
| <i>Jnk2 (Mapk9)</i>  | Rat     | 5'-GGAATTGTTTGTGCTGCTT-3'  |
| <i>JNK2 (MAPK9)</i>  | Human   | 5'-TTCCAAGGCACTGACCATA-3'  |
| <i>Jnk3 (Mapk10)</i> | Rat     | 5'-GCCTCCGCCTCAGATATAT-3'  |
| <i>Ppp1ca #1</i>     | Rat     | 5'-GCTTGTTGCTGGCCTATAA-3'  |
| <i>Ppp1ca #2</i>     | Rat     | 5'-GAAATAGCCTCCATGTGCT-3'  |
| <i>Ppp1cb #1</i>     | Rat     | 5'-CAAGTCTCGTGAAATCTTT-3'  |
| <i>Ppp1cb #2</i>     | Rat     | 5'-CTTTATGATGTCACACCTT-3'  |
| <i>Ppp1cc #1</i>     | Rat     | 5'-GTGACATCCACGGGCAGTA-3'  |
| <i>Ppp1cc #2</i>     | Rat     | 5'-GTTGAAGATGGATATGAGT-3'  |
| <i>Ppp2ca #1</i>     | Rat     | 5'-GAAAGTTTAACCTTGTACA-3'  |
| <i>Ppp2ca #2</i>     | Rat     | 5'-GATACAAATTACTTGTTTA-3'  |
| <i>Ppp2cb #1</i>     | Rat     | 5'-CTTTGATTATCTTCCACTT-3'  |
| <i>Ppp2cb #2</i>     | Rat     | 5'-GCTTGTAATGGAAGGATAT-3'  |

792

793 **Table S3. Sequence of real-time PCR primer used in this study.**

| Gene name            | Species | Forward primer                     | Reverse primer                     |
|----------------------|---------|------------------------------------|------------------------------------|
| <i>Actb</i>          | Rat     | 5'-<br>GCAGGAGTACGATGAGT<br>CCG-3' | 5'-<br>ACGCAGCTCAGTAACAGTCC<br>-3' |
| <i>Bnip3</i>         | Rat     | 5'-<br>GTCGCAGAGCGGGGAGG<br>AGA-3' | 5'-<br>TCTGGGAGCGAGGTGGGCT<br>G-3' |
| <i>Erk1 (Mapk3)</i>  | Rat     | 5'-<br>TACCGAGCCCCAGAGAT<br>CAT-3' | 5'-<br>TGGGATGGGGAACCCAGTA<br>T-3' |
| <i>Erk2 (Mapk1)</i>  | Rat     | 5'-<br>AATGTTCTGCACCGTGAC<br>CT-3' | 5'-<br>TGGTCTGGATCTGCAACACG<br>-3' |
| <i>Erk5 (Mapk7)</i>  | Rat     | 5'-<br>CGCCCCACCTTTTGACTT<br>TG-3' | 5'-<br>CCATGGCACAGTCTCCACTT-<br>3' |
| <i>Jnk1 (Mapk8)</i>  | Rat     | 5'-<br>ACTTAAAGCCAGTCAGG<br>CGA-3' | 5'-<br>TTGATGTACGGGTGCTGGAG<br>-3' |
| <i>Jnk2 (Mapk9)</i>  | Rat     | 5'-<br>TCCAGAAGTCATCCTGGG<br>CA-3' | 5'-<br>CTCTCCTGGGAACAGGACT<br>T-3' |
| <i>Jnk3 (Mapk10)</i> | Rat     | 5'-<br>GTTTGGTACGACCCTGCT<br>GA-3' | 5'-<br>GAGGGCTGGCCTTTGACTAC<br>-3' |

794

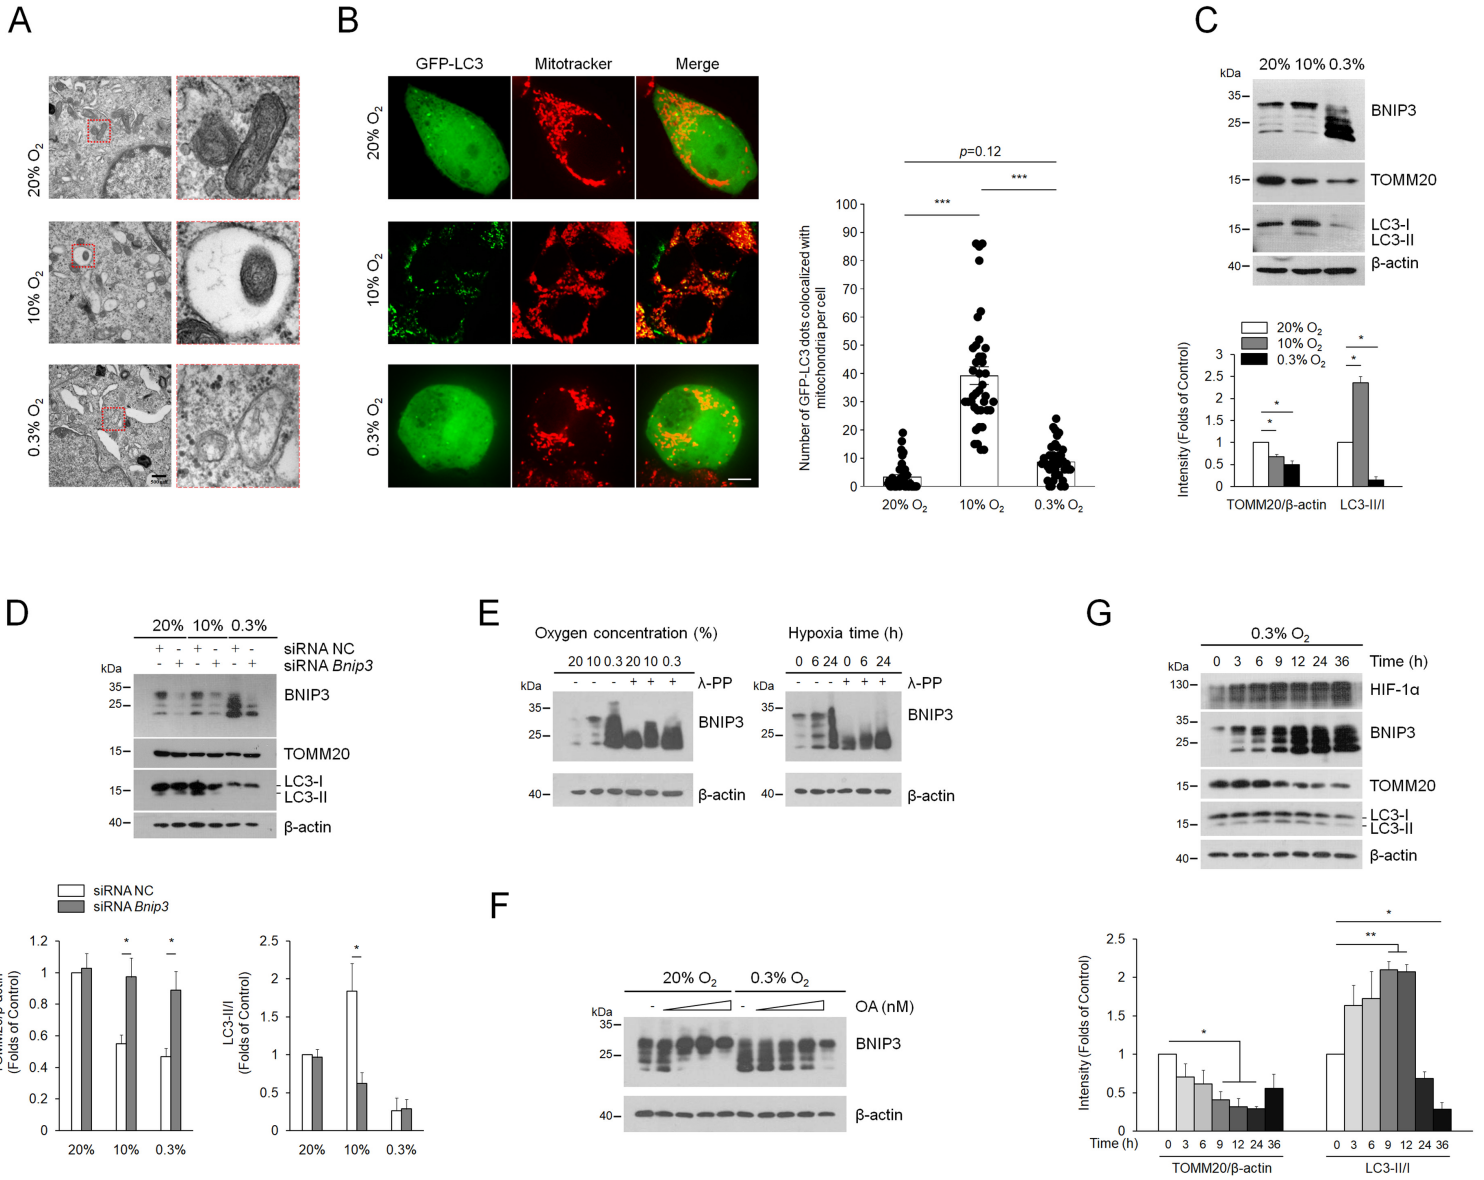

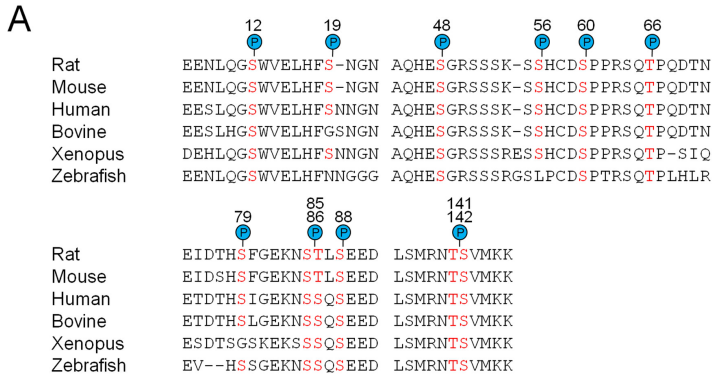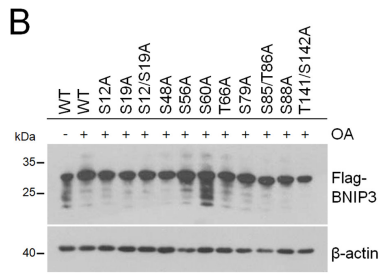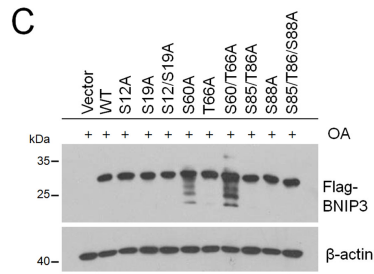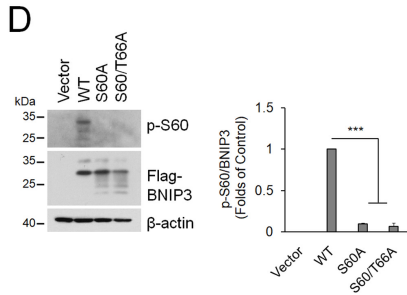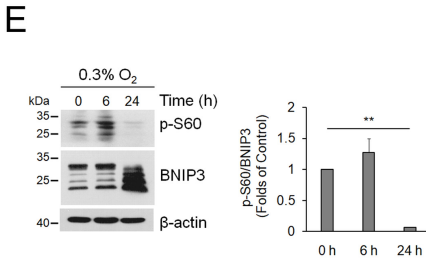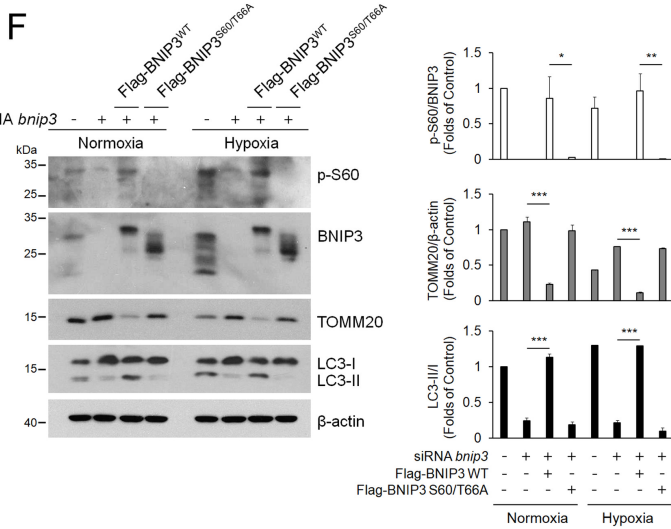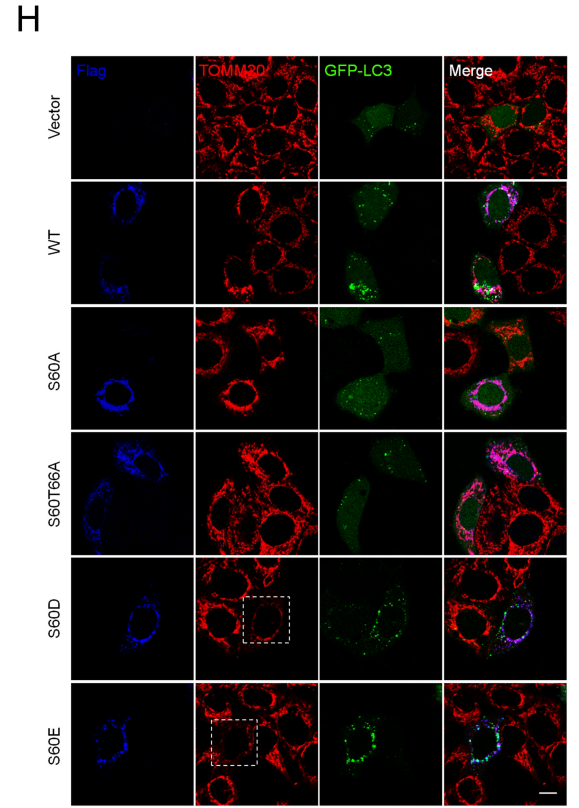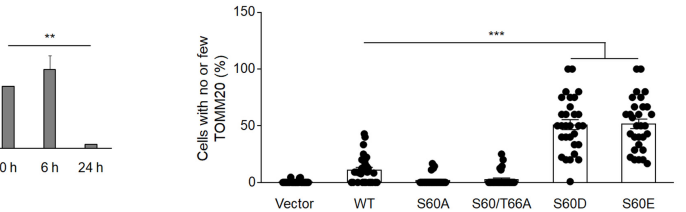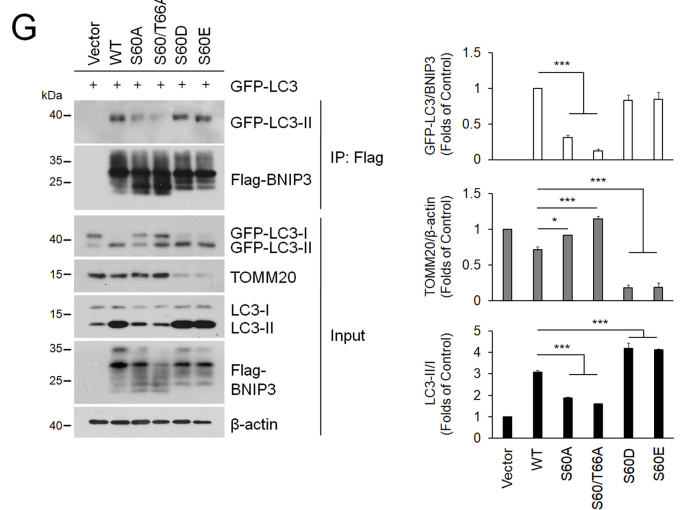

**A**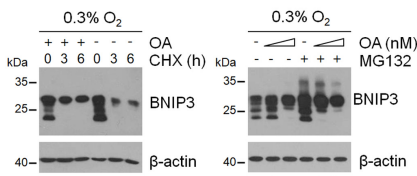**B**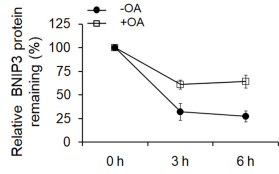**C**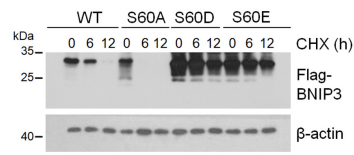**E**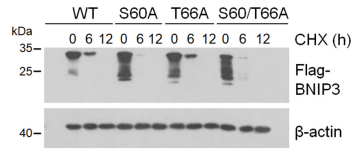**D**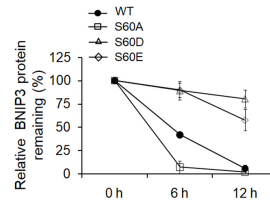**F**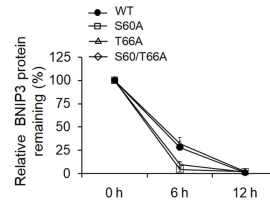**G**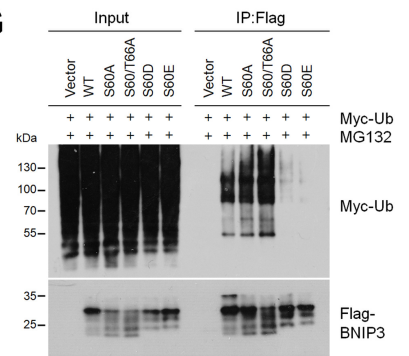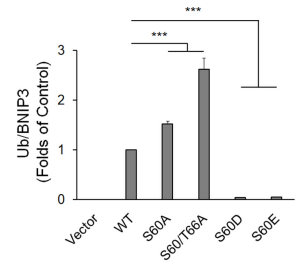

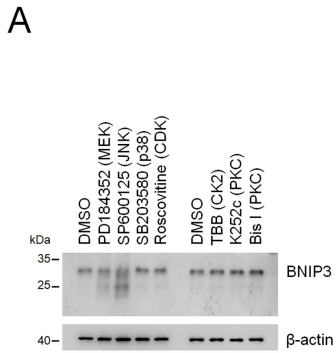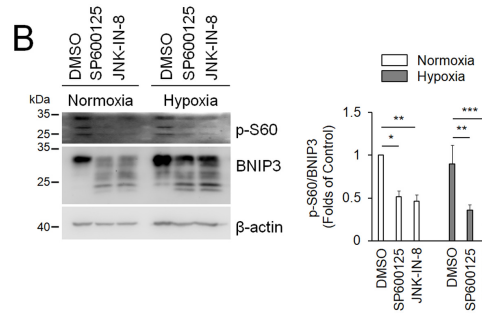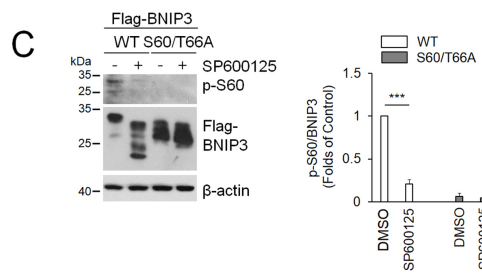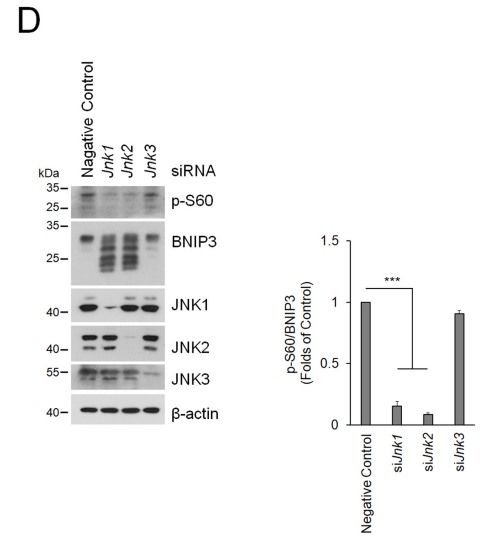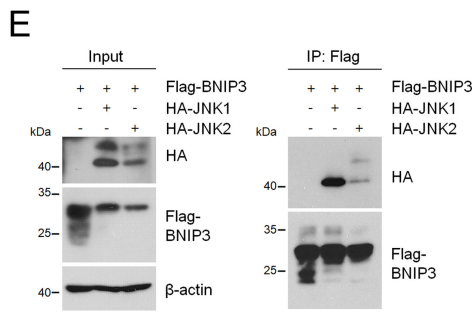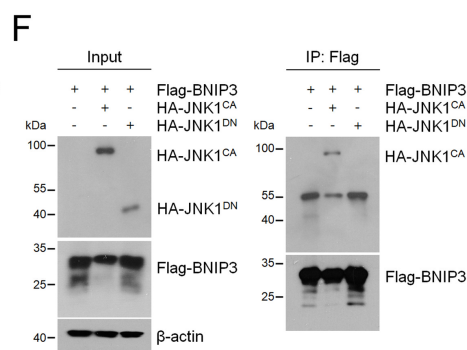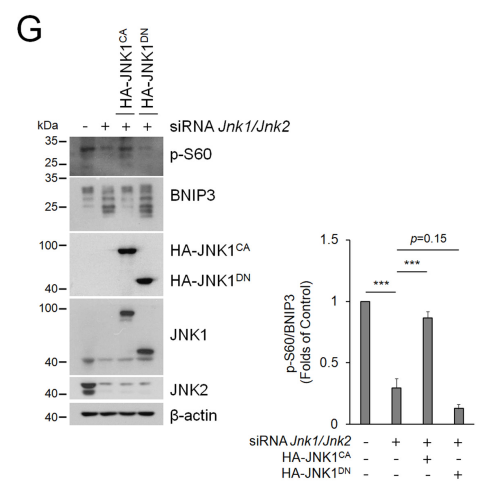

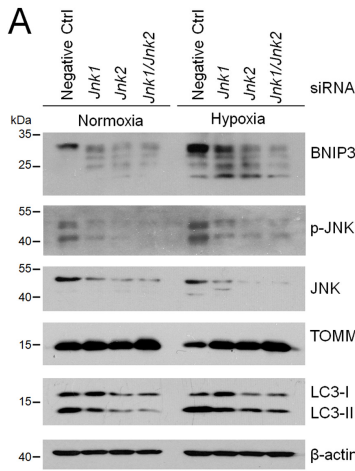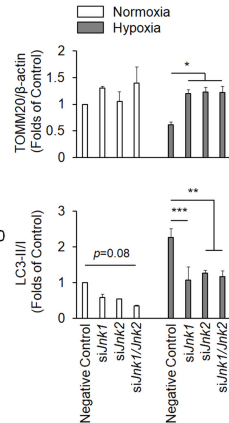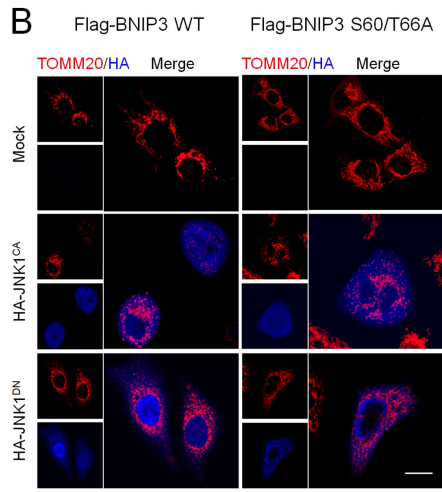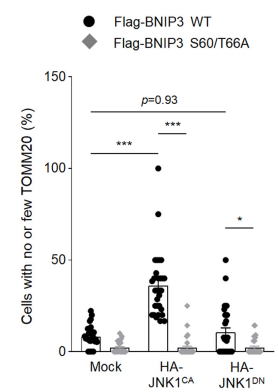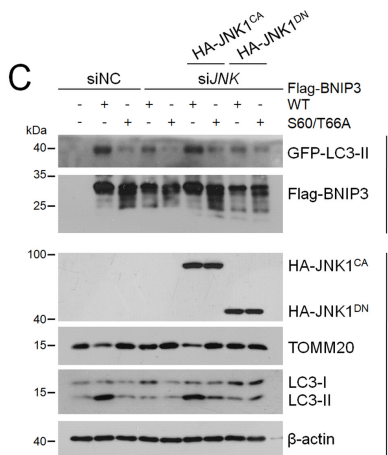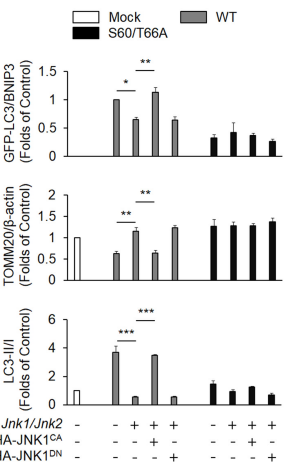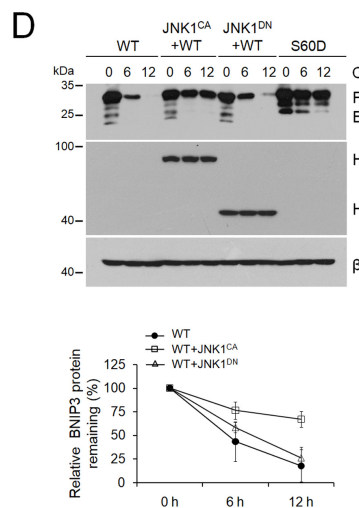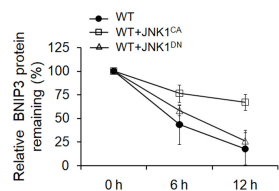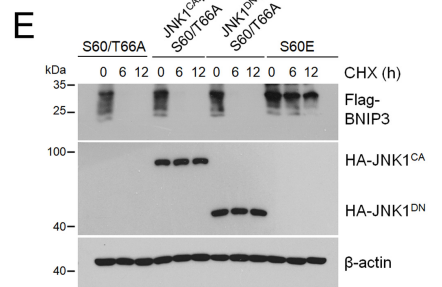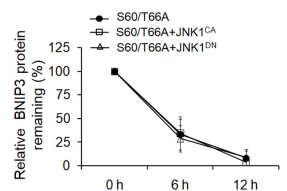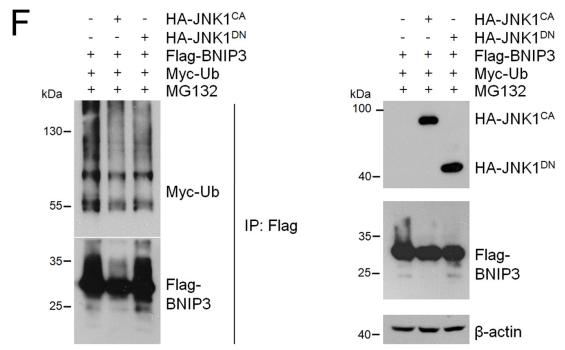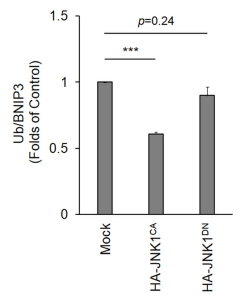



**A**

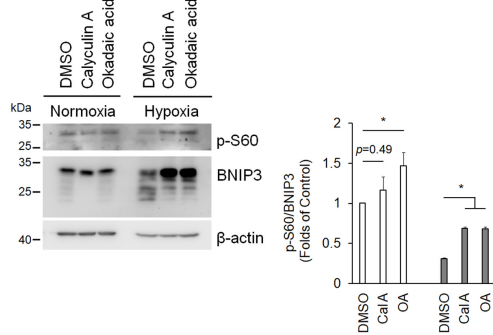

**B**

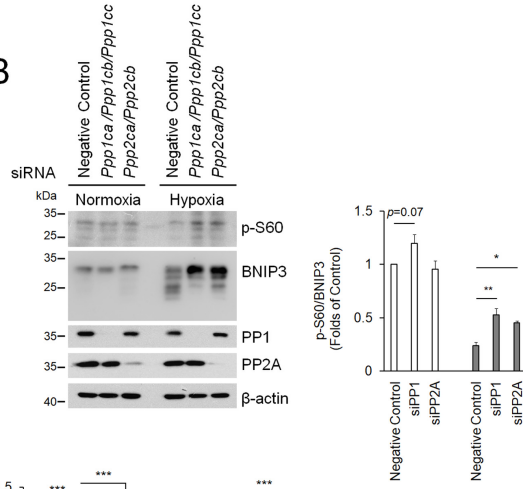

**C**

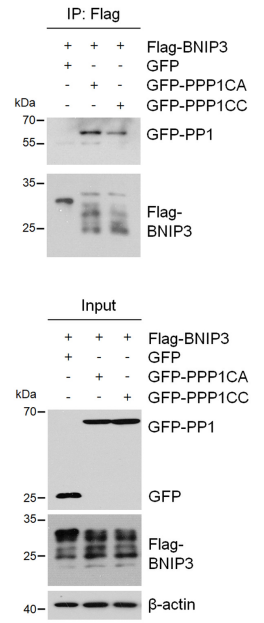

**D**

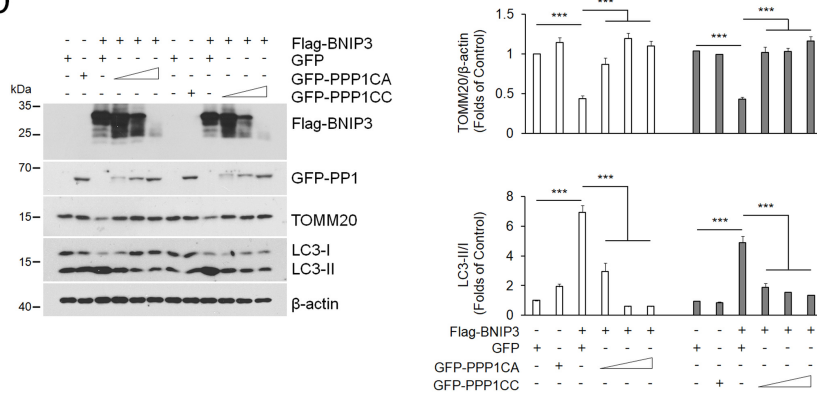

**E**

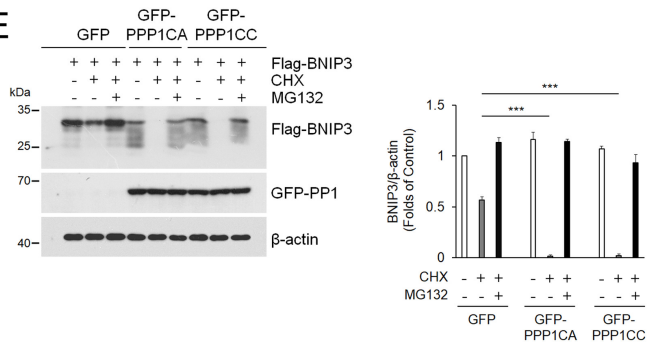

**F**

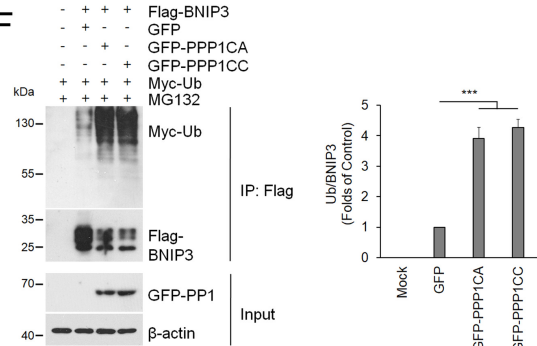

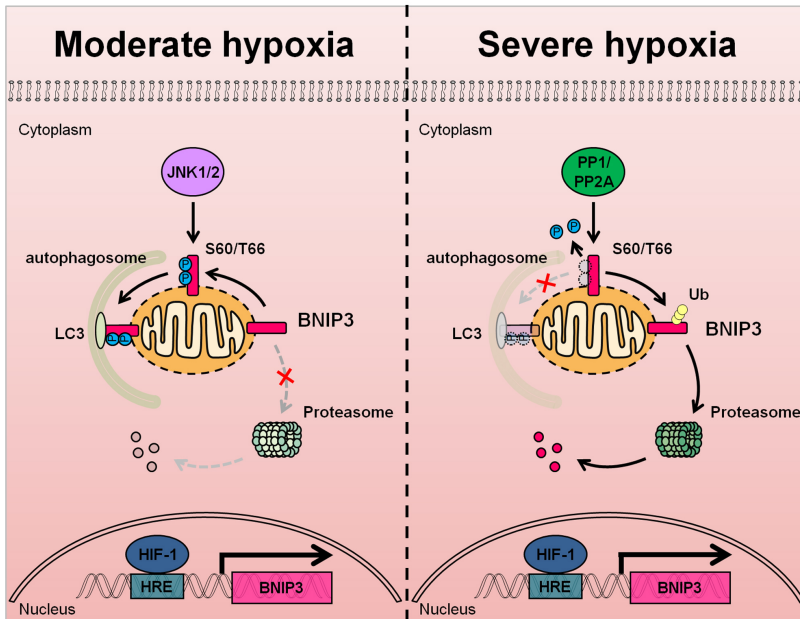

Source: https://www.biorxiv.org/content/10.1101/2020.08.27.271270v1.full.pdf
